# Supplementary material
Source: publisher figshare collection journal article supplement (https://gsapubs.figshare.com/articles/dataset/_/21325902)
Supplement: Supplementary file 1 [file 1]

## Sheet: Sheet1
Table S3 Cyclades granites U-Pb zircon results
Island	Rock Type	Location	Sample													Ratios									Ages									Common-Pb corrected ages		Best age
						Cps	Cps	Cps	Cps	Cps	Cps					Data for Tera-Wasserberg plot				Data for Wetherill plot														Cor.206/238-Pb Age
				Spot number	comment	204Pb	206Pb	207Pb	208Pb	232Th	235U	Th/U	Pb ppm	Th ppm	U ppm	238U/206Pb	1s %	207Pb/206Pb	1s %	207Pb/235U	1s %	207Pb/235U	1s %	Rho	207Pb/235U	2s	207Pb/235U	2s	207Pb/206Pb	2s	concordia age	2s	discordance		2s [Ma]	Best age	2s
Naxos	Orthogneiss	Core	TL57	12		bd	6199.36	319.637	29.1264	19254.3	19432.6	6.49423	69.6748	6440.58	991.739	380.943	2.0603	0.0502696	2.66944	0.0181866	3.37205	0.00262507	2.0603	0.610991	18.31	1.22	16.74	0.68	230.3	123.4	16.67	0.68	9.1	16.8168	0.688612	16.8168	0.688612
				11		bd	5878.63	314.13	-1.95655	10134.9	16158.9	4.11092	65.8727	3390.14	824.666	375.372	2.2928	0.0534223	3.62846	0.019614	4.29216	0.00266403	2.2928	0.534182	19.71	1.68	17.38	0.8	313.7	165.6	17.3	0.8	13	16.9978	0.771516	16.9978	0.771516
				18		bd	64608.5	3524.98	184.448	12453.5	19212.3	4.24858	726.931	4165.71	980.494	33.0162	8.15915	0.0545401	1.88876	0.227664	8.37491	0.0302881	8.15915	0.974237	208.3	31.6	192.4	31	391.9	91.4	191.2	34.8	8.7	191.255	30.5009	191.2	34.8
				16		bd	86320.8	4998.97	10318.7	251070	24570.4	66.9749	1081.48	83982.9	1253.95	30.3753	6.96172	0.0571131	1.70307	0.259132	7.167	0.0329215	6.96172	0.971357	233.9	30	208.7	28.6	496.1	77	187	33	13	207.045	28.0654	187	33
				19		bd	141893	7460.33	123.045	7274.24	25243.8	1.88871	1590.5	2433.24	1288.31	21.4207	3.29043	0.05127	1.45983	0.329865	3.59973	0.0466838	3.29043	0.914077	289.49	18.14	294.23	18.92	251.4	68.8	290.7	17.82	-1.9	294.465	18.9366	290.7	17.82
				10		bd	126386	6567.05	5389.78	324060	22034.7	96.3936	1472.02	108398	1124.54	20.8793	1.61142	0.052323	1.29065	0.345368	2.06457	0.0478943	1.61142	0.780511	301.26	10.74	301.62	9.5	298.5	59	301.53	9.36	-0.14	301.598	9.48971	301.53	9.36
				15		bd	48793.2	2590.07	279.57	14263.6	8479.26	11.0256	549.715	4771.2	432.737	20.8141	1.50398	0.0523828	1.50775	0.346846	2.12962	0.0480443	1.50398	0.706221	302.31	11.14	302.23	8.86	302.9	68.6	302.24	8.8	0.031	302.507	8.88305	302.24	8.8
				5		bd	129312	6991.32	4905.52	280416	21262.6	86.4403	1502.52	93799.1	1085.13	19.6058	2.11461	0.0535643	1.42223	0.376528	2.54839	0.0510054	2.11461	0.829781	324.46	14.18	320.66	13.2	351.8	64.4	321.75	13.06	1.4	320.396	13.193	321.75	13.06
				8		bd	199645	10915.9	16019.3	875746	32458.5	176.84	2410.91	292938	1656.51	19.3312	1.67288	0.0539557	1.29881	0.384666	2.11789	0.0517298	1.67288	0.789883	330.49	11.96	324.95	10.6	369.7	58.8	326.11	10.52	2	324.719	10.5727	326.11	10.52
				4		bd	113942	6215.83	693.872	26642.6	18707.1	9.33473	1285.91	8911.96	954.71	19.2347	2.7485	0.0538984	1.27849	0.386185	3.0313	0.0519893	2.7485	0.906707	331.59	17.14	326.79	17.52	365.4	56.8	329.72	17.12	1.7	326.345	17.4483	329.72	17.12
				17		bd	59135.8	3270.26	810.606	25752.4	9278.57	18.1915	672.652	8614.2	473.529	19.0233	2.05276	0.0548346	2.19196	0.397261	3.00308	0.0525672	2.05276	0.683551	339.69	17.32	330.46	13.22	403.3	98.6	331.45	13.2	3.2	329.536	13.146	331.45	13.2
				2		bd	158265	10368.8	10076.8	246188	19359.4	83.35	1901.56	82349.8	988	14.0755	4.16538	0.0650849	1.34199	0.637268	4.37623	0.0710454	4.16538	0.951821	500.6	34.6	442.2	35.6	777.6	57.8	467	48.6	15	437.455	34.7294	467	48.6
				13		bd	49932.6	3058.36	6213.45	176585	7435.84	155.652	629.959	59067.8	379.486	13.8925	8.52061	0.0609824	1.60627	0.604967	8.67069	0.0719815	8.52061	0.982691	480.4	66.4	448.2	73.8	637.2	74.4	547.6	61.2	8.4	445.326	72.4516	547.6	61.2
				6		bd	131362	7730.35	20111	598334	13782.5	284.543	1693.98	200143	703.385	13.0593	4.26619	0.0587269	1.36658	0.619759	4.47972	0.0765738	4.26619	0.952334	489.7	34.8	475.8	39.2	555.4	61.2	497.6	35.4	3.5	474.416	38.8041	497.6	35.4
				1		bd	224162	13452	14260.1	461608	20847.6	145.127	2680.05	154408	1063.95	11.8042	2.13932	0.0588369	1.21157	0.686942	2.45857	0.0847157	2.13932	0.870147	530.9	20.4	524.1	21.6	560.4	53	528.9	20.4	1.6	523.591	21.4547	528.9	20.4
				3		bd	166781	10137.3	3285.2	93415.4	14879	41.1504	1917.44	31247.5	759.348	10.3851	2.44326	0.0602045	1.17293	0.798959	2.71022	0.096292	2.44326	0.901499	596.3	24.4	592.7	27.6	609.9	51.2	596.5	24.6	0.77	592.284	27.5758	596.5	24.6
				9		bd	96849.6	5884.43	5033.49	127792	8722.23	96.0301	1146.69	42746.6	445.137	9.60753	4.61181	0.0594967	1.49021	0.853467	4.8466	0.104085	4.61181	0.951556	626.6	45.4	638.4	56	584.1	66	615.4	41.2	-2.4	639.423	56.0066	615.4	41.2
				7		bd	208510	20305.2	42126.7	617966	12566.1	322.325	2882.94	206710	641.309	6.70002	6.91884	0.0924295	2.7237	1.90126	7.43565	0.149253	6.91884	0.930496	1081.5	99	897	116	1474.8	103.8	1233.2	110.4	26	872.252	108.676	1233.2	110.4
				20		bd	239167	25683.5	15291.6	184370	19581.3	61.7136	2980.83	61672	999.327	6.20429	9.56963	0.10379	1.6616	2.30553	9.71282	0.161179	9.56963	0.985258	1214	137.6	963.4	171.2	1691.9	50.8	1673.3	29	32	926.925	156.625	1673.3	29
				14		bd	191638	29425.2	18704.1	222192	9452.35	154.07	2551.23	74323.3	482.399	4.89453	7.91992	0.14792	2.77833	4.16506	8.39311	0.20431	7.91992	0.943622	1667.2	137.4	1198.4	173.2	2321.3	98.4	325.5	112.6	48	1105.05	145.641	325.5	112.6
Naxos	Leucogranite	Core/ KSZ	TL58	10		2127.13	379676	203090	379018	958027	502729	12.4903	10233.8	320461	25656.7	389.408	3.79401	0.209695	15.0162	0.0742146	15.4881	0.002568	3.79401	0.244963	72.7	21.8	16.74	1.26	2882	488	16.14	1.24	140	13.1189	1.13318	13.1189	1.13318
				5		552.444	189488	16534.5	21821.7	1603169	736510	14.267	2424.36	536261	37587.6	467.874	1.86599	0.0827705	4.57306	0.0243811	4.93911	0.00213733	1.86599	0.377799	24.48	2.38	13.52	0.5	1298.8	177.8	13.08	0.5	59	13.129	0.470138	13.129	0.470138
				9		bd	55108.9	3941.07	3934.09	325261	215032	9.91426	670.176	108800	10974.1	475.037	1.52449	0.0703197	5.47525	0.0204012	5.68352	0.0021051	1.52449	0.26823	20.51	2.3	13.52	0.42	942	224	13.4	0.4	42	13.1445	0.390638	13.1445	0.390638
				7		1330.9	79092.1	19451.3	41415	2159301	239115	59.1885	1489.22	722287	12203.2	363.249	4.28357	0.239334	6.33857	0.0908041	7.65026	0.00275293	4.28357	0.559925	88.25	12.94	18.02	1.54	3088	202	13.93	1.36	160	13.3988	0.960566	13.3988	0.960566
				11		bd	37233.8	1999.64	830.12	190623	140250	8.90844	426.293	63763.4	7157.64	453.698	1.39714	0.0530525	1.88467	0.0161155	2.34606	0.00220411	1.39714	0.595527	16.22	0.76	14.17	0.4	332.1	85.4	14.04	0.4	14	14.0721	0.389453	14.0721	0.389453
				6		303.657	47078.6	7195.71	12898	221931	156008	9.32396	714.741	74235.9	7961.84	398.621	1.78385	0.143191	4.43626	0.0495064	4.78147	0.00250865	1.78385	0.373075	49.06	4.58	16.1	0.58	2271.1	153.2	15	0.56	110	14.1743	0.469194	14.1743	0.469194
				2		bd	35791.9	1905.2	690.395	192010	132883	9.47076	408.459	64227.6	6781.67	449.72	1.46682	0.0528482	1.6505	0.0161955	2.2081	0.00222361	1.46682	0.664289	16.32	0.72	14.17	0.42	346.1	75.2	13.99	0.42	14	14.2002	0.412691	14.2002	0.412691
				14		bd	57908.6	6954.53	10753	228408	191273	7.82689	804.587	76402.6	9761.55	409.65	1.90018	0.108259	6.64006	0.0364214	6.9066	0.00244111	1.90018	0.275125	36.3	4.92	15.45	0.58	1799	242	15.03	0.58	85	14.4872	0.528728	14.4872	0.528728
				8		bd	66454.5	4777.84	4635.11	264512	222617	7.78786	807.261	88479.4	11361.2	417.295	2.4409	0.0681114	4.19815	0.0224948	4.85618	0.00239639	2.4409	0.502637	22.59	2.18	15.45	0.76	868.4	174.6	14.96	0.74	38	15.0051	0.712312	15.0051	0.712312
				12		698.562	80861.3	12644.8	24021	871602	242567	23.5514	1250.54	291551	12379.4	372.126	2.73269	0.150128	4.71297	0.0556005	5.4479	0.00268726	2.73269	0.501603	54.94	5.82	17.38	0.94	2338.5	161.6	15.01	0.88	110	15.0311	0.73659	15.0311	0.73659
				4		bd	61756	10262.5	19917.4	227564	192321	7.75543	978.236	76120.2	9815.08	382.736	3.73554	0.128847	11.3618	0.0463959	11.9602	0.00261277	3.73554	0.312332	46.05	10.78	16.74	1.26	2090	400	16.04	1.22	100	15.0673	1.06832	15.0673	1.06832
				1		404.175	36721.2	7787	15852.9	153519	102590	9.80815	642.266	51352.1	5235.66	339.401	2.3339	0.205476	4.2882	0.083436	4.88218	0.00294637	2.3339	0.478044	81.34	7.62	18.67	0.86	2894.5	139	15.83	0.8	140	15.1521	0.621763	15.1521	0.621763
				3		842.186	126899	18622.2	34165.2	1661790	373585	29.1553	1911.94	555870	19065.8	359.293	2.62394	0.141538	5.36301	0.0542914	5.97051	0.00278325	2.62394	0.439484	53.69	6.24	18.02	0.94	2235.2	185.6	16.28	0.9	110	15.7623	0.75456	15.7623	0.75456
				13		1828.55	986150	77402	79968.6	4249937	2267555	12.2844	12167.5	1.42161e+06	115724	291.805	3.53876	0.079309	2.66257	0.0374572	4.42856	0.00342695	3.53876	0.799077	37.38	3.26	21.88	1.54	1196.8	105	16.7	1.36	54	21.1389	1.4322	21.1389	1.4322
Naxos	Leucogranite	Core/ KSZ	TL63	10		bd	148592	8734.78	4947.58	2171571	555483	0.0346062	27.4041	476.43	13767.2	482.935	1.7994	0.0568553	1.34589	0.0162251	2.24706	0.00207067	1.7994	0.800782	16.32	0.72	13.52	0.48	450.4	60.2	12.86	0.48	19	13.1567	0.46669	13.1567	0.46669
				15		bd	57416.9	3027.25	89.8669	37123.5	79652.4	0.00412573	10.2227	8.14467	1974.12	178.11	3.09906	0.0508094	1.34328	0.0393153	3.37766	0.00561451	3.09906	0.917517	39.14	2.6	36	2.22	236.2	61.2	34.88	2.22	8.5	35.9071	2.20759	35.9071	2.20759
				17		bd	90662.3	5123.02	4656.66	100137	66790.2	0.0132719	16.9622	21.9694	1655.34	93.8049	2.45016	0.0545108	1.14082	0.0800871	2.70273	0.0106604	2.45016	0.90655	78.24	4.06	68.61	3.34	383.2	50.6	64.34	3.3	14	67.7451	3.27178	67.7451	3.27178
				1		bd	69329	8224.66	4944.32	75103.4	39547.7	0.0168108	13.9319	16.4772	980.157	69.0798	7.44182	0.104752	2.9688	0.208985	8.01214	0.014476	7.44182	0.928818	192.7	28.2	92.8	13.72	1706.2	108.6	31.79	8.16	76	86.0378	11.8015	86.0378	11.8015
				13		bd	67349.7	3649.73	331.711	18171.4	31419.6	0.00511963	12.0461	3.9867	778.708	57.2433	2.79203	0.0529327	1.2889	0.12744	3.07518	0.0174693	2.79203	0.907926	121.76	7.08	111.84	6.18	320.2	58.2	109.61	6.26	9	110.988	6.10546	109.61	6.26
				23		bd	87640.4	4670.34	171.391	20007	34858.8	0.00508066	15.618	4.38941	863.946	48.5533	4.73253	0.052985	1.18115	0.150397	4.8777	0.0205959	4.73253	0.970238	142.27	12.96	131.45	12.3	326.7	54	125.57	13.08	8.4	130.711	12.169	125.57	13.08
				24		bd	98680	5125.09	4978.63	248891	28050.8	0.0785444	18.3709	54.6052	695.214	35.4464	3.59877	0.0519426	1.34436	0.201956	3.84167	0.0282116	3.59877	0.936771	186.82	13.1	179.27	12.74	283.3	60.2	180.86	13.02	4.5	178.838	12.6462	180.86	13.02
				3		bd	408929	21959.4	9467.28	576669	85945.1	0.0593959	74.3654	126.518	2130.08	26.7071	1.95177	0.0529524	1.12325	0.273253	2.2519	0.0374433	1.95177	0.866718	245.33	9.82	236.7	9.06	328.7	50.6	238.24	9.14	4	236.37	9.03013	238.24	9.14
				2		bd	286476	15264.9	5268.56	320942	59781.2	0.047524	51.8465	70.4127	1481.62	26.4506	1.52162	0.0527476	1.14613	0.274836	1.90498	0.0378063	1.52162	0.79876	246.52	8.32	239.18	7.14	317	52	240.09	7.16	3.4	238.695	7.11133	240.09	7.16
				20		bd	95700.7	5731	4198.86	111425	18606.3	0.0530117	17.8384	24.4459	461.141	24.9711	3.35199	0.0594622	1.29846	0.328178	3.5947	0.0400463	3.35199	0.932482	288.19	18.02	252.83	16.62	585.7	57.4	241.7	18.12	15	250.565	16.2855	241.7	18.12
				8		bd	183509	9770.52	6192.85	361340	34849.1	0.091786	33.6861	79.2759	863.704	23.5055	2.02803	0.052828	1.16369	0.309743	2.33818	0.0425433	2.02803	0.867354	273.95	11.24	268.31	10.68	322.4	52.6	269.93	10.64	2.4	268.179	10.6294	269.93	10.64
				5		bd	41980.3	2306.32	6434.77	359928	7737.23	0.411795	8.56561	78.966	191.761	23.3938	1.45629	0.0543239	1.35039	0.320033	1.98603	0.0427463	1.45629	0.733264	281.9	9.8	269.55	7.72	385.7	61.2	270.53	7.74	5.1	268.945	7.6418	270.53	7.74
				19		bd	163480	8728.16	1541.88	90968.4	30185.4	0.0266774	29.3421	19.9579	748.119	22.8632	1.65958	0.052858	1.07823	0.318624	1.97909	0.0437383	1.65958	0.838558	280.83	9.72	275.73	8.96	323.5	49	276.95	8.92	2.1	275.6	8.93657	276.95	8.92
				26		bd	159378	8535.19	192.993	9952.12	28186.1	0.00312558	28.3891	2.18343	698.569	22.24	1.43404	0.0535259	1.0821	0.331693	1.7965	0.0449641	1.43404	0.798241	290.86	9.12	283.75	7.94	348.4	49	284.88	7.94	2.8	282.983	7.92012	284.88	7.94
				22		bd	247285	13361	1926.76	42522.1	43480	0.00865716	44.3422	9.32909	1077.61	22.1583	1.8767	0.0541283	1.08953	0.336661	2.17005	0.0451297	1.8767	0.864822	294.67	11.1	284.37	10.46	377.1	50	287.09	10.5	4	283.801	10.3847	287.09	10.5
				25		bd	67413	3656.71	2182.93	98513.2	11551.8	0.0754909	12.3706	21.6132	286.302	21.6559	1.78117	0.0539376	1.49101	0.343258	2.32286	0.0461767	1.78117	0.7668	299.67	12.04	291.15	10.14	366.6	66.8	292.29	10.14	3.3	290.359	10.0832	292.29	10.14
				9		bd	154850	8107.29	10971.9	615958	26140.3	0.208589	29.3725	135.137	647.865	21.4879	1.82025	0.0530811	1.26627	0.340449	2.21738	0.0465378	1.82025	0.820903	297.47	11.46	293	10.44	332.8	57.8	294.06	10.36	1.7	292.906	10.4044	294.06	10.36
				7		bd	814373	44065.3	26244.4	1464917	132359	0.0979737	149.402	321.394	3280.41	20.6132	1.42377	0.0532089	0.934521	0.35575	1.70307	0.0485126	1.42377	0.836001	309	9.06	305.31	8.48	337	42	306.36	8.38	1.4	305.102	8.47193	306.36	8.38
				11		bd	189847	10972.9	2515.77	87085.6	27086	0.0284612	34.3384	19.1061	671.302	18.0338	1.5279	0.0578971	1.31654	0.442461	2.01686	0.0554514	1.5279	0.757561	372.01	12.6	348.2	10.38	523.2	57.8	350.33	10.52	7.7	346.015	10.2293	350.33	10.52
				18		bd	109809	7576.12	17096.6	348264	14938.5	0.206373	22.7107	76.4071	370.238	16.7205	2.77215	0.0689612	1.23428	0.568411	3.03451	0.059807	2.77215	0.913541	457	22.4	374.4	20.2	896.9	52	332.7	22.8	23	367.665	19.416	332.7	22.8
				12		bd	352076	21327.1	126101	3563974	36729.6	0.858953	84.3541	781.914	910.311	13.2789	2.73927	0.0599426	1.17184	0.622126	2.97939	0.0753072	2.73927	0.919404	491.2	23.2	468	24.8	600.6	50.8	487.7	24.6	5.9	466.05	24.4759	487.7	24.6
				6		bd	175740	11786.2	4724.18	101506	17474.8	0.0514202	32.4665	22.2699	433.097	12.61	1.65344	0.0668014	1.04161	0.730089	1.95418	0.079302	1.65344	0.846105	556.61	16.72	491.94	15.64	830.7	43.2	498.8	16.96	15	486.157	15.2782	498.8	16.96
				4		bd	292380	17758.2	9297.5	294224	27221.1	0.0956803	53.9449	64.5509	674.652	11.9207	1.60057	0.0601721	1.14314	0.695664	1.96688	0.0838878	1.60057	0.813764	536.22	16.42	519.36	15.98	608.6	50.2	526.11	15.7	4	517.761	15.858	526.11	15.7
				21		bd	142331	8759.43	22908.9	590877	11492.4	0.455131	29.3843	129.635	284.83	10.1353	1.43911	0.0612879	1.09121	0.833381	1.80604	0.0986649	1.43911	0.796833	615.5	16.72	606.79	16.7	647.7	46.8	611	16	1.8	605.71	16.5934	611	16
				16		bd	67134.6	4357.04	29107.8	641299	5235.19	1.08437	16.9888	140.697	129.75	9.97745	1.66301	0.0651264	1.30014	0.899587	2.11092	0.100226	1.66301	0.787814	651.5	20.4	615.58	19.5	778.1	54.6	628.12	19.54	7.3	612.227	19.2811	628.12	19.54
				14		bd	141170	8719.37	48201.1	1194332	10242.2	1.03224	33.4526	262.029	253.845	9.30924	1.76703	0.0604234	1.18695	0.894534	2.12867	0.10742	1.76703	0.830109	648.8	20.4	657.6	22.2	618.1	51.4	651.08	19.94	-1.8	658.609	22.1186	651.08	19.94
Naxos	Leucogranite	KSZ	TL69	13		bd	10644	544.848	74.8251	16245.4	30454.1	0.00472211	1.90216	3.56415	754.779	363.568	1.81403	0.0498014	2.40978	0.0188783	3.01625	0.00275052	1.81403	0.60142	19.01	1.14	18.02	0.66	145.7	113.4	18	0.66	5.4	17.6302	0.63598	17.6302	0.63598
				28		bd	17734.8	1158.06	608.706	14688	29732.2	0.00437308	3.29334	3.22246	736.887	213.529	1.67606	0.0632172	2.81208	0.0408024	3.27368	0.00468321	1.67606	0.511982	40.6	2.6	30.23	1.02	706.9	119.8	29.56	1	30	29.4888	0.966099	29.4888	0.966099
				26		bd	44506	2447.51	807.875	70063	57454.8	0.0107948	8.06574	15.3714	1423.97	162.597	1.67118	0.0544667	1.39875	0.0461664	2.1793	0.00615019	1.67118	0.766843	45.86	1.96	39.84	1.32	372.9	62.8	38.91	1.32	14	39.1437	1.29164	39.1437	1.29164
				25		bd	32463.3	1676.97	164.99	37667.8	38106.7	0.00875023	5.79332	8.26408	944.442	154.091	3.42084	0.0522383	1.5238	0.0467217	3.74488	0.00648969	3.42084	0.913472	46.34	3.38	41.77	2.84	290.1	71	40.15	2.82	11	41.417	2.8047	41.417	2.8047
				42		bd	26654.2	1595.06	579.872	17670.1	26929.5	0.00580848	4.86854	3.87672	667.424	129.312	1.60826	0.0591032	1.34981	0.0629907	2.09964	0.00773321	1.60826	0.76597	62.03	2.52	49.45	1.58	579.6	58.4	46.68	1.56	23	48.9033	1.54302	48.9033	1.54302
				14		bd	31639.9	2013.06	1151.22	24835.2	30145.7	0.00729278	5.87758	5.44869	747.135	118.754	3.5567	0.0628385	1.34355	0.0729263	3.80201	0.00842078	3.5567	0.93548	71.45	5.24	53.92	3.82	706.3	55.4	36.47	3.22	29	52.9853	3.67798	52.9853	3.67798
				61		bd	144889	7460.01	18400	1320100	95036.6	0.122961	28.8354	289.622	2355.4	83.0888	2.3051	0.0504679	1.21988	0.0837103	2.60799	0.0120353	2.3051	0.883862	81.62	4.1	76.9	3.54	222.1	57.6	76.51	3.56	6.2	76.8393	3.50751	76.8393	3.50751
				38		bd	78064.2	4220.91	370.622	24182.7	44274.2	0.0048351	13.9586	5.30554	1097.3	81.9832	8.16923	0.054371	1.19622	0.0914006	8.25634	0.0121976	8.16923	0.989449	88.81	14.04	78.17	12.7	385	52.6	42.98	10.34	13	77.4884	12.4645	77.4884	12.4645
				62		bd	27010.8	1371.5	396.112	26179.8	16029.8	0.0144574	4.85997	5.7437	397.284	76.1995	3.28805	0.051616	1.709	0.093355	3.70567	0.0131234	3.28805	0.887304	90.67	6.44	83.9	5.48	272.6	77.6	82.69	5.52	8.1	83.6351	5.43506	83.6351	5.43506
				60		bd	49352.1	2926.36	32348.6	770494	29357.8	0.232325	14.2915	169.042	727.608	74.962	2.10371	0.0584123	1.25035	0.107391	2.44724	0.0133401	2.10371	0.859627	103.58	4.82	85.17	3.56	551	54.8	78.41	3.48	20	84.2814	3.47461	84.2814	3.47461
				49		bd	290518	16001.5	6166.31	446118	149111	0.0264845	52.8051	97.8756	3695.58	67.042	2.00658	0.0545953	1.08895	0.112231	2.28302	0.014916	2.00658	0.878914	107.98	4.68	95.34	3.8	396.5	48.8	91.9	3.82	13	94.6467	3.73776	94.6467	3.73776
				17		bd	91177.6	4799.99	6779.98	405558	41777.4	0.0859335	17.3533	88.977	1035.42	60.347	1.99808	0.0515595	1.09474	0.11775	2.27833	0.0165708	1.99808	0.876993	112.98	4.88	106.13	4.22	259.9	50	105.54	4.24	6.6	105.493	4.16197	105.54	4.24
				15		bd	88235.7	4695.59	4513.37	280039	38522	0.0643518	16.456	61.4388	954.734	56.298	2.5165	0.0527709	1.15048	0.129184	2.76702	0.0177626	2.5165	0.909463	123.38	6.44	113.74	5.68	313.4	52.4	111.94	5.76	8.6	112.864	5.59678	111.94	5.76
				19		bd	124873	6775.92	16907.6	1202376	49178.1	0.216431	25.0876	263.794	1218.84	51.1269	2.78729	0.053737	1.10189	0.144854	2.99718	0.0195592	2.78729	0.929968	137.4	7.72	125.13	6.92	355	50	121.4	7.08	9.9	124.056	6.80088	121.4	7.08
				53		bd	69389.3	3648.16	101.211	12140.5	25016.6	0.00429596	12.3513	2.66356	620.015	46.8711	2.2556	0.0527218	1.24821	0.155021	2.57793	0.0213351	2.2556	0.874964	146.32	7.04	135.87	6.08	319.3	58	135.31	6.16	7.9	135.415	6.01211	135.31	6.16
				6		bd	92142.7	4906.05	246.74	19492.2	33574.7	0.00513924	16.4309	4.27646	832.12	45.2423	3.8955	0.0525636	1.03464	0.16012	4.03056	0.0221032	3.8955	0.966491	150.79	11.3	140.91	10.88	309	44.8	137.87	11.6	7.2	140.283	10.7519	137.87	11.6
				39		bd	94269.3	5009.53	119.578	15163.9	33537.7	0.00400248	16.786	3.32687	831.203	44.6836	1.64441	0.0521249	1.06816	0.160769	1.96088	0.0223796	1.64441	0.838608	151.4	5.52	142.81	4.64	288.2	48.8	142.63	4.68	6.3	142.102	4.60189	142.63	4.68
				11		bd	162363	8543.68	115.591	12282.2	50009.7	0.00217407	28.8815	2.69465	1239.45	39.2686	1.5741	0.0519486	1.21441	0.18232	1.98811	0.0254656	1.5741	0.791756	170.04	6.24	162.32	5.04	278.8	56	162.52	5.06	5	161.572	5.00472	162.52	5.06
				45		bd	176727	9221.94	205.244	18399.2	58190.3	0.00279897	31.4369	4.03666	1442.2	38.3029	6.57655	0.0518617	1.05977	0.186604	6.66139	0.0261077	6.57655	0.987264	173.7	21.2	166.1	21.6	278.9	43.2	175.5	25.4	4.9	165.63	21.4053	175.5	25.4
				18		bd	87145	4652.52	9056.47	548496	25269	0.192148	17.0318	120.337	626.272	36.9137	1.90682	0.0530959	1.0179	0.198234	2.1615	0.0270902	1.90682	0.882175	183.6	7.26	172.37	6.5	330.7	46.8	172.63	6.6	6.8	171.544	6.42351	172.63	6.6
				7		bd	98082.4	5250.04	541.898	32674	26249	0.0110189	17.5419	7.16847	650.559	34.3459	1.4809	0.0526517	1.24444	0.211273	1.93435	0.0291156	1.4809	0.765582	194.64	6.84	184.91	5.4	314.3	56.2	185.13	5.44	5.6	184.352	5.3612	185.13	5.44
				1		bd	152712	8019.52	145.417	9462.09	40357.7	0.00207545	27.1681	2.07593	1000.23	33.2808	1.64073	0.0521785	1.03174	0.216075	1.93816	0.0300474	1.64073	0.846538	198.66	7	190.55	6.16	296.1	46.8	191.14	6.22	4.6	190.308	6.13313	191.14	6.22
				36		bd	78202.5	4169.62	154.741	8432.87	20101.7	0.00371358	13.9368	1.85012	498.204	32.7194	1.92605	0.0526793	1.33358	0.221891	2.34267	0.0305629	1.92605	0.822159	203.49	8.64	194.3	7.4	311.3	61.2	194.99	7.44	5.1	193.421	7.31103	194.99	7.44
				22		bd	165977	8688.5	259.809	12871.4	42659	0.00267095	29.5406	2.82391	1057.27	32.6898	1.47171	0.0516852	1.15487	0.217901	1.87073	0.0305906	1.47171	0.786701	200.16	6.8	194.3	5.64	269.8	52.8	194.74	5.64	3.3	193.834	5.60595	194.74	5.64
				23		bd	164590	8683.33	571.2	35663.1	42361.3	0.00745247	29.3581	7.82427	1049.89	32.167	2.75444	0.0530743	1.12216	0.227395	2.97425	0.0310878	2.75444	0.926094	208.05	11.18	197.43	10.7	330.1	49.8	198.78	11	5.7	196.613	10.6183	198.78	11
				35		bd	77403.6	4134.65	108.978	8357.05	19464.6	0.00380066	13.7882	1.83349	482.412	31.8916	1.81347	0.0524468	1.36801	0.226647	2.27159	0.0313562	1.81347	0.798326	207.39	8.52	199.3	7.1	300.3	62.2	199.83	7.14	4.4	198.449	7.06306	199.83	7.14
				3		bd	124136	6586.81	157.271	10062.8	35597.2	0.00250239	22.1025	2.20773	882.246	31.7533	5.90431	0.0528352	0.990304	0.229319	5.98678	0.0314928	5.90431	0.986224	209.6	22.6	199.9	23.2	320	38.6	218.5	28	5.2	199.208	23.0432	218.5	28
				10		bd	136808	7473.42	2416.55	33525.7	32760.3	0.009059	24.7737	7.35533	811.936	29.6871	2.36012	0.0541193	1.04669	0.251241	2.58181	0.0336846	2.36012	0.914134	227.55	10.52	213.66	9.92	373.6	48.4	215.28	10.2	7	212.585	9.81727	215.28	10.2
				43		bd	90609.7	4996.23	7383.99	306427	21175.1	0.128101	17.3925	67.2283	524.806	29.5414	1.50869	0.0544547	1.29177	0.254045	1.98616	0.0338508	1.50869	0.759602	229.82	8.2	214.91	6.38	385.2	58.2	215.15	6.44	7.4	213.534	6.30244	215.15	6.44
				52		bd	143776	7823.31	403.635	27434.5	32305.5	0.00751747	25.6696	6.01897	800.665	28.6409	3.08211	0.0536489	1.04589	0.258155	3.25474	0.0349151	3.08211	0.946963	233.22	13.54	221.14	13.4	356.7	46	224.76	14.02	5.9	220.395	13.2906	224.76	14.02
				9		bd	188296	10074	492.647	18412.5	41727.9	0.00390605	33.5832	4.0396	1034.19	28.0251	1.54929	0.0539016	1.13638	0.26507	1.92137	0.0356823	1.54929	0.806347	238.77	8.18	226.12	6.9	365.1	51	226.84	6.96	6	225.113	6.82352	226.84	6.96
				27		bd	61466.3	4007.1	20816.8	486995	13260.1	0.325108	14.5723	106.844	328.641	27.3606	1.93915	0.0641248	1.24312	0.323003	2.3034	0.036549	1.93915	0.841864	284.21	11.4	231.1	8.82	747.6	53	215.99	9	23	227.594	8.52225	215.99	9
				40		bd	174566	17932.2	4805.27	57351	33771.4	0.0150329	33.3197	12.5825	836.994	25.1515	3.9526	0.0989739	2.00649	0.542328	4.43273	0.039759	3.9526	0.891687	439.9	31.6	251.59	19.5	1602	75.6	131.45	14.94	62	236.522	17.2424	131.45	14.94
				54		bd	94176.3	5108.63	4897.3	289755	18903.5	0.135687	17.5939	63.5705	468.508	26.1148	1.61919	0.0534035	1.16838	0.281831	1.99672	0.0382924	1.61919	0.810926	252.08	8.94	242.29	7.7	344.3	53.2	243.39	7.76	4.4	241.531	7.64957	243.39	7.76
				50		bd	710000	37809.1	49653.6	2684062	135088	0.175885	134.672	588.867	3348.03	24.3571	1.43048	0.0528358	1.01868	0.298956	1.75612	0.0410557	1.43048	0.814565	265.62	8.24	259.65	7.28	318.6	47.2	260.71	7.26	2.6	258.919	7.24371	260.71	7.26
				29		bd	382290	20575.2	355.62	21714	69474.1	0.00276673	68.0942	4.76392	1721.86	23.6997	2.16049	0.0526105	1.07357	0.305939	2.41253	0.0421946	2.16049	0.895532	271	11.48	266.46	11.28	310.4	48	268.29	11.18	1.9	266.081	11.2388	268.29	11.18
				63		bd	383609	20234.1	13882.5	724710	68835.8	0.0931968	70.5437	158.997	1706.03	23.3516	1.58135	0.0525029	1.16045	0.309866	1.96146	0.0428237	1.58135	0.806212	274.1	9.42	270.17	8.36	307.9	52.6	270.91	8.32	1.6	270.031	8.3496	270.91	8.32
				47		bd	276452	15505	2122.75	31500.8	49940.4	0.00558368	49.663	6.91108	1237.73	23.2603	1.57618	0.0553408	1.17661	0.327897	1.96691	0.0429918	1.57618	0.801347	287.96	9.88	271.4	8.4	424.6	53	272.85	8.5	6.7	270.13	8.29588	272.85	8.5
				55		bd	69450.8	4877.58	14261.1	140424	12883	0.0964886	14.9606	30.8082	319.294	22.5064	2.93765	0.0704272	1.42735	0.43126	3.26606	0.0444317	2.93765	0.899449	364.1	20	280.05	16.12	941.6	58.6	223.96	16.1	30	273.853	15.3685	223.96	16.1
				46		bd	266046	14276.4	2421.08	88535	46352	0.0169082	47.7486	19.424	1148.8	22.5896	1.54973	0.0531091	1.11316	0.324016	1.90808	0.0442681	1.54973	0.812191	284.97	9.5	279.43	8.48	330.7	51	280.55	8.44	2.2	278.806	8.43846	280.55	8.44
				31		bd	123182	6643.06	141.709	7906.89	20774.5	0.0033692	21.9482	1.73472	514.878	21.7846	1.43734	0.0535672	1.10337	0.338888	1.81201	0.0459041	1.43734	0.793231	296.34	9.32	289.3	8.16	352.2	50.4	290.6	8.12	2.7	288.801	8.09875	290.6	8.12
				4		bd	150929	8227.18	6858.99	286494	25662.4	0.0988257	28.036	62.8551	636.02	21.5709	2.08475	0.054119	1.2115	0.345771	2.41121	0.0463588	2.08475	0.864608	301.56	12.58	292.38	11.9	373.2	55.6	294.94	11.9	3.5	291.423	11.8401	294.94	11.9
				21		bd	163982	12419.2	6985.91	149440	26836	0.0492944	30.9696	32.7861	665.108	20.6541	3.52763	0.074661	1.07019	0.498189	3.68639	0.0484166	3.52763	0.956933	410.5	25	304.7	21	1059.2	41.8	137.36	15.98	34	296.484	19.844	137.36	15.98
				20		bd	112094	5945.67	237.026	13258.2	18790.6	0.00624589	19.974	2.90877	465.71	21.1582	1.73949	0.0526827	1.22839	0.343159	2.1295	0.047263	1.73949	0.816854	299.59	11.06	297.92	10.14	312.6	55.6	298.36	10.02	0.64	297.549	10.1034	298.36	10.02
				34		bd	108001	5781.56	1003.91	25168.3	17471.5	0.0127519	19.3846	5.52178	433.016	20.7951	1.68755	0.0536515	1.06885	0.355572	1.99756	0.0480883	1.68755	0.844802	308.92	10.66	302.85	10	355.1	49.2	304.61	9.92	2.3	302.309	9.94428	304.61	9.92
				16		bd	117625	6339.32	17643.3	978395	18765.8	0.461527	23.9141	214.654	465.095	20.7123	1.52462	0.0540304	1.23363	0.359514	1.9612	0.0482805	1.52462	0.777391	311.84	10.54	304.08	9.04	370.3	55.4	305.28	9.02	2.9	303.358	9.01131	305.28	9.02
				32		bd	126547	7112.44	5512.7	100731	20235.3	0.044066	23.5028	22.0998	501.515	20.0597	3.65814	0.0550816	1.12998	0.378433	3.82869	0.0498512	3.65814	0.955455	325.9	21.4	313.9	22.4	412.2	48.2	326.9	22.6	4.3	312.673	22.2236	326.9	22.6
				44		bd	170408	10563	13319.9	284705	26000.8	0.0969301	32.8111	62.4626	644.408	19.7304	1.4562	0.0619959	1.10692	0.433044	1.82915	0.0506831	1.4562	0.796106	365.3	11.24	318.82	9.08	672.1	47.2	315.84	9.4	16	315.112	8.84716	315.84	9.4
				57		bd	135094	7469.97	4232.65	129022	20895.1	0.05466	24.7904	28.3066	517.867	19.6388	1.84278	0.0553528	0.976637	0.388445	2.08559	0.0509195	1.84278	0.88358	333.2	11.88	320.04	11.5	426.1	44.6	324.34	11.58	4.7	319.164	11.4297	324.34	11.58
				48		bd	76773.1	4476.92	6480.39	154543	11577.3	0.118166	14.8155	33.9057	286.933	19.1817	2.58415	0.0574783	1.0469	0.412975	2.78816	0.0521331	2.58415	0.92683	351.03	16.56	327.4	16.48	510.5	45.4	335.59	17.54	8.1	325.799	16.3065	335.59	17.54
				5		bd	80772.8	4572.6	8396.44	367138	12036.3	0.270015	15.8307	80.5479	298.309	18.7604	2.11482	0.0558982	1.09595	0.410641	2.38193	0.0533038	2.11482	0.887862	349.31	14.08	334.75	13.78	447.3	48.4	339.95	13.92	4.9	333.644	13.6909	339.95	13.92
				58		bd	143722	9261.48	513.29	16806.3	17191.5	0.00865382	25.9218	3.6872	426.078	15.2319	3.44197	0.0630813	2.24781	0.570761	4.11093	0.0656519	3.44197	0.837272	458.5	30.4	410.2	27.4	708.6	95	413.4	28.8	13	405.859	26.7469	413.4	28.8
				2		bd	561912	35368.1	32719.8	902666	44176.2	0.18088	106.392	198.04	1094.87	9.84435	1.61611	0.062324	0.949825	0.872517	1.87456	0.101581	1.61611	0.862127	636.92	17.72	623.78	19.28	683.8	41	634.05	17.92	2.7	622.361	19.105	634.05	17.92
				33		bd	306022	20211	58606.2	1279238	19711.7	0.574484	64.99	280.657	488.538	8.19961	1.42828	0.0649183	1.11335	1.09114	1.81095	0.121957	1.42828	0.788691	749.04	19.2	742.1	20	769.9	47	746.23	18.66	1.3	741.022	19.9428	746.23	18.66
				37		bd	218912	14560.1	45049.8	1015148	14018.1	0.641049	47.0356	222.717	347.426	8.1804	1.54729	0.0660748	1.06213	1.11318	1.87676	0.122243	1.54729	0.824448	759.7	20.2	743.2	21.8	808.6	45.2	754.7	20.2	2.9	741.698	21.5906	754.7	20.2
				12		bd	73594.2	5038.82	26585.7	592876	4640.72	1.13091	17.7689	130.073	115.016	7.98862	1.46861	0.0674921	1.1825	1.16436	1.8855	0.125178	1.46861	0.778894	784	20.6	760.4	21.2	851.8	49.4	772.7	20.2	4.1	757.688	20.8866	772.7	20.2
				24		bd	45012.8	3450.07	12515.8	198815	2173.47	0.809742	10.2978	43.6189	53.8676	6.31743	1.95129	0.075923	1.27156	1.6563	2.32903	0.158292	1.95129	0.837811	992	29.6	947.3	34.4	1092	50.8	988.4	31	6.5	941.5	33.8727	988.4	31
				56		bd	385466	58785.8	14790.9	120991	15274.8	0.0701179	77.5212	26.5446	378.572	5.08376	1.62694	0.152308	0.956954	4.12899	1.88751	0.196705	1.62694	0.86195	1660.1	31	1157.6	34.6	2371.3	33.6	668	34.8	51	1059.06	28.8329	668	34.8
				51		bd	650487	121888	53294.3	485953	23251.7	0.185008	139.436	106.615	576.273	4.63357	1.99233	0.184821	1.45542	5.4972	2.46731	0.215817	1.99233	0.80749	1900.2	42.6	1259.6	45.6	2696	48.4	802	45.8	59	1111.49	35.5764	802	45.8
				59		bd	532190	80489.1	50472.9	420017	20112.6	0.184863	111.99	92.1491	498.474	4.72611	2.70902	0.148514	1.06006	4.33082	2.90904	0.21159	2.70902	0.931241	1699.2	48	1237.3	61	2328	37.2	399.7	44	46	1142.52	51.8111	399.7	44
				8		bd	60496.2	6998.07	13030	119130	1529.89	0.689303	13.5986	26.1363	37.917	3.20289	1.89777	0.114665	1.10732	4.93394	2.1972	0.312218	1.89777	0.863721	1808.1	37.2	1751.5	58.4	1873.9	41	1834.5	34	5.1	1736.99	56.9908	1834.5	34
				30		bd	500095	82890.4	25140	198119	9697.55	0.180848	102.698	43.466	240.345	2.726	1.76991	0.163392	0.99049	8.26061	2.02822	0.366838	1.76991	0.872645	2260	37	2014.3	61.2	2490.5	34.4	2392.7	29.4	19	1925.72	55.7088	2392.7	29.4
				41		bd	1513596	308234	158959	1027696	24865.2	0.365867	334.507	225.47	616.263	2.08202	1.42902	0.198516	1.05717	13.1406	1.77756	0.480303	1.42902	0.803923	2689.8	33.8	2528.6	59.8	2813.3	35.6	2742.9	31	10	2437.24	55.2814	2742.9	31
Naxos	Leucogranite	NPDS	TL72	3		bd	101968	8924.5	9539.27	1308776	542070	0.0248198	17.0347	261.758	10546.4	493.813	3.26004	0.0659389	2.05653	0.0184029	3.8545	0.00202506	3.26004	0.845775	18.51	1.42	12.88	0.84	829.2	84.8	10.36	0.76	36	12.7173	0.80782	12.7173	0.80782
				6		bd	53661.2	6190.86	9821.93	549783	188918	0.0299162	9.85522	109.958	3675.53	413.443	1.62713	0.120857	4.64587	0.0402869	4.92257	0.00241872	1.62713	0.330545	40.12	3.88	15.45	0.5	1982.5	165.4	14.76	0.5	95	14.1063	0.433261	14.1063	0.433261
				1		411.554	66296.1	9790.79	17513.6	508458	219940	0.0237651	13.2396	101.693	4279.08	386.965	1.45994	0.142605	3.055	0.0507887	3.38592	0.00258421	1.45994	0.431181	50.31	3.32	16.74	0.48	2248.2	106	15.18	0.46	110	14.6134	0.389731	14.6134	0.389731
				10		bd	85458.9	4597.78	2888.37	872693	306334	0.0292856	13.1469	174.541	5959.94	422.623	1.21708	0.053901	2.02215	0.0175772	2.36016	0.00236617	1.21708	0.515676	17.72	0.82	15.45	0.38	336.8	91.4	15.36	0.38	14	15.0897	0.363402	15.0897	0.363402
				5		bd	33728.5	1621.2	63.6724	41846.8	102383	2.67896	376.813	13997.8	5225.09	369.355	1.37171	0.0473518	1.66455	0.0176684	2.15692	0.00270742	1.37171	0.635955	17.82	0.76	17.38	0.48	76.7	79	17.37	0.48	2.5	17.4082	0.47633	17.4082	0.47633
				7		bd	46897.9	2921.66	471.215	49427.5	62584.8	5.17643	535.115	16533.5	3194	156.695	3.22131	0.0613585	1.6859	0.0539666	3.63581	0.00638181	3.22131	0.885996	53.4	3.78	41.13	2.64	646.1	71.4	34.13	2.44	27	40.2585	2.53777	40.2585	2.53777
				4		bd	126058	8429.26	5697.65	113673	10585.2	70.386	1491.62	38023.5	540.214	9.67936	5.86108	0.0656681	1.87317	0.935004	6.15313	0.103313	5.86108	0.952536	670.3	60.4	633.7	70.8	795.1	80.6	702.5	60.2	7.2	630.163	69.5735	702.5	60.2
				2		bd	184825	13174.8	10777	212907	10246.5	136.19	2221.47	71217.6	522.927	6.32761	2.22731	0.0704173	1.26297	1.53372	2.56047	0.158038	2.22731	0.869884	944	31.4	945.7	39.2	940.1	52	943.6	31.2	-0.25	946.062	39.0871	943.6	31.2
				8		371.996	1162266	216244	127102	1887156	23182.7	0.836819	212.965	377.436	451.036	2.41102	1.28877	0.187732	1.01608	10.7311	1.64114	0.414762	1.28877	0.78529	2500.1	30.6	2236.8	48.8	2721.5	33.8	2570.9	30	18	2118.17	43.555	2570.9	30
				9		bd	704589	130827	153229	851740	10916.4	0.802077	139.841	170.35	212.386	1.82373	1.25108	0.18269	0.991375	13.8057	1.59625	0.548327	1.25108	0.78376	2736.5	30.6	2818.1	57.2	2676.8	33.8	2712.9	28.8	-5.1	2873.08	59.1441	2712.9	28.8
Naxos	Leucogranite	CHSZ	TLN8	22		bd	26586.9	1282.97	68.3077	27742.8	101321	0.00281475	3.95179	5.54863	1971.27	453.58	1.14695	0.0475542	1.55237	0.0144491	1.93012	0.00220468	1.14695	0.59424	14.52	0.56	14.17	0.32	73	74.2	14.16	0.32	2.5	14.1745	0.324276	14.1745	0.324276
				23		bd	22091.6	1070.21	36.6407	22089	82228.7	0.00276147	3.28136	4.41785	1599.82	439.911	1.21653	0.0483978	1.69102	0.0151624	2.08314	0.00227319	1.21653	0.583988	15.32	0.64	14.81	0.36	95.9	80.4	14.81	0.36	3.4	14.5989	0.353862	14.5989	0.353862
				9		bd	13729.7	661.809	28.944	18937.5	46944.3	2.64405	153.439	6334.59	2395.79	410.362	1.73826	0.0475481	2.44041	0.0159688	2.99619	0.00243687	1.73826	0.580157	16.12	0.96	15.45	0.54	116.5	115.4	15.44	0.54	4.2	15.6662	0.543128	15.6662	0.543128
				26		bd	409.784	71.8085	46.3483	985.289	1222.2	0.00828723	0.074676	0.19706	23.7788	344.573	3.90521	0.165319	8.67567	0.0661223	9.51409	0.00290214	3.90521	0.410466	64.99	11.98	18.67	1.46	2511	292	16.9	1.38	120	15.8734	1.13034	15.8734	1.13034
				12		bd	20747.8	938.36	1.76983	28230	68068.7	2.71828	230.769	9442.96	3473.87	405.212	1.6001	0.0450395	2.11707	0.0153185	2.65374	0.00246785	1.6001	0.602962	15.42	0.82	16.1	0.52	0.00017	102.904	16.07	0.52	-4.3	15.9155	0.509525	15.9155	0.509525
				37		bd	24315.3	1218.09	114.585	24077.3	76365.9	0.00324113	3.62785	4.81552	1485.75	378.029	1.24794	0.0496095	1.65742	0.0180861	2.07471	0.0026453	1.24794	0.601503	18.21	0.74	16.74	0.42	217.6	76.8	16.69	0.42	8.5	16.9605	0.421019	16.9605	0.421019
				6		bd	26836.7	1255.03	631.549	67389.2	62944.7	7.01716	305.627	22541.7	3212.37	245.611	10.7993	0.0470854	2.00014	0.0264208	10.9829	0.00407148	10.7993	0.983278	26.46	5.74	26.38	5.68	33.9	104.8	26.4	5.68	0.31	26.1755	5.63578	26.1755	5.63578
				5		bd	18748.9	1006.6	213.658	16985.4	33965.9	3.27764	212.48	5681.61	1733.44	126.937	18.9627	0.0499688	2.37801	0.0542522	19.1113	0.00787794	18.9627	0.992228	53.69	19.98	50.73	19.16	188	125.6	45.63	19.5	5.8	50.3981	18.9406	50.3981	18.9406
				18		bd	72060.9	4260.32	7773.45	358022	69715.5	0.052792	11.895	71.6053	1356.37	119.449	3.56609	0.0610763	1.7197	0.0704689	3.95909	0.0083718	3.56609	0.900735	69.17	5.3	53.92	3.84	634.7	74.4	44.61	3.56	26	52.7972	3.683	52.7972	3.683
				30		bd	93655.8	8953.48	8182.56	92351.6	55317.8	0.017162	15.6712	18.4705	1076.25	70.1285	6.30431	0.0907059	1.72209	0.178257	6.53529	0.0142595	6.30431	0.964658	166.6	20	91.53	11.46	1434.6	70	24.24	6.08	62	86.3657	10.2245	86.3657	10.2245
				27		bd	4305.45	286.89	961.31	34547.7	1529.23	0.232239	0.78555	6.90962	29.7522	42.3059	2.52051	0.0674681	3.29438	0.219788	4.148	0.0236374	2.52051	0.607645	201.74	15.18	150.37	7.5	854.7	136.6	144.91	7.44	31	147.148	7.16304	144.91	7.44
				11		bd	96044.5	5083.5	8510.01	517842	17596.2	192.89	1166.59	173219	898.02	38.243	12.1065	0.059197	6.32696	0.213331	13.6601	0.0261486	12.1065	0.886268	196.3	48.8	166.1	39.8	577	270	154.2	40.2	18	164.369	38.6944	154.2	40.2
				35		bd	48617.2	2683.62	6671.9	328939	15468.1	0.218608	8.20011	65.7887	300.943	37.3	1.1328	0.0546704	1.17467	0.201999	1.6319	0.0268097	1.1328	0.694162	186.82	5.56	170.49	3.8	398.6	53	170.12	3.84	9.9	169.449	3.76324	170.12	3.84
				17		bd	37599.9	2178.2	1910.32	67954.6	23048.1	19.3248	443.582	22730.8	1176.25	31.2964	13.8092	0.0546527	2.40172	0.24067	14.0165	0.0319525	13.8092	0.98521	219	55.2	203.1	55.2	394	88.8	189.9	90	8.3	201.63	54.2865	189.9	90
				4		bd	64734.1	3411.96	7780.74	438497	13016.8	220.796	807.892	146678	664.311	22.6806	4.58151	0.0525843	1.71136	0.319527	4.89071	0.0440905	4.58151	0.936779	281.5	24	278.2	25	309.2	76.2	280.8	24.2	1.3	277.882	24.85	280.8	24.2
				36		bd	30197.4	1735.14	5468.63	244517	5599.78	0.448876	5.2903	48.904	108.948	21.9303	1.68859	0.0561032	1.81843	0.352574	2.48153	0.0455991	1.68859	0.680462	306.67	13.14	287.45	9.5	455.6	80.8	288.24	9.58	7.4	286.014	9.39323	288.24	9.58
				2		bd	62705.8	3345.67	7972.91	463145	11481.7	264.388	787.65	154922	585.965	21.9358	1.58902	0.0526445	1.50669	0.330755	2.18977	0.0455877	1.58902	0.725653	290.18	11.06	287.45	8.94	312.2	68.2	287.81	8.9	1.1	287.164	8.91298	287.81	8.9
				15		bd	169285	9114.5	15383.1	921753	28691.6	210.567	2061.93	308327	1464.27	20.8257	1.36816	0.0527417	1.27742	0.349029	1.87181	0.0480177	1.36816	0.730928	303.97	9.84	302.23	8.1	317.3	58.2	302.51	8.04	0.66	302.208	8.06989	302.51	8.04
				10		bd	46806.7	2504.29	3749.46	213147	8223.95	169.875	564.585	71297.8	419.707	20.7541	1.77686	0.0523292	1.47661	0.347494	2.31033	0.0481833	1.77686	0.769095	302.84	12.1	303.46	10.56	298	67.4	303.33	10.42	-0.24	303.389	10.5243	303.33	10.42
				8		bd	53896.7	2932.93	5625.48	327839	10250.4	209.629	664.548	109662	523.126	20.6238	3.12985	0.0524218	1.41057	0.350307	3.43303	0.0484876	3.12985	0.911688	304.95	18.08	305.31	18.66	302.2	65	305.06	17.88	-0.14	305.242	18.6357	305.06	17.88
				16		bd	128203	6993.95	1320.67	66603.7	21330.1	20.4662	1452.6	22279	1088.58	20.4238	1.44418	0.0531653	1.26204	0.358755	1.91792	0.0489625	1.44418	0.752994	311.32	10.3	308.38	8.68	333.4	57.8	308.88	8.62	1.1	307.906	8.67151	308.88	8.62
				25		bd	144917	7814.8	16274.1	782457	25590.5	0.314318	23.9055	156.493	497.881	20.3186	1.54855	0.0537589	1.21263	0.364639	1.96684	0.049216	1.54855	0.787327	315.64	10.7	309.61	9.38	360.4	54.6	310.74	9.34	2.2	309.25	9.33083	310.74	9.34
				28		bd	83306.1	4443.49	14069.3	714866	13984.5	0.525493	14.402	142.975	272.078	20.1599	1.12923	0.0528455	1.20633	0.361264	1.65239	0.0496033	1.12923	0.683393	313.18	8.9	312.07	6.9	321.5	55.2	312.21	6.84	0.41	311.996	6.87286	312.21	6.84
				42		bd	21857.5	1186.42	3165.1	148765	3661.12	0.41771	3.70721	29.7534	71.2298	20.0777	1.32467	0.0534376	1.75547	0.366808	2.19919	0.0498065	1.32467	0.602346	317.28	12	313.29	8.08	346.7	79.8	313.59	8.06	1.5	313.028	8.0819	313.59	8.06
				20		bd	98802.4	5271.72	10721.4	599294	16242.1	0.379302	16.2376	119.86	316.003	19.9669	1.25924	0.0531332	1.26466	0.366743	1.78467	0.0500829	1.25924	0.705586	317.2	9.7	315.14	7.76	332.4	57	315.42	7.7	0.75	314.856	7.72999	315.42	7.7
				1		bd	53370.6	2889.11	4060.75	225185	8571.5	172.192	641.835	75324.5	437.444	19.8988	1.45444	0.0530483	1.50761	0.367409	2.09483	0.0502542	1.45444	0.694301	317.72	11.42	316.36	8.96	327.7	68.8	316.55	8.88	0.5	315.949	8.95889	316.55	8.88
				41		bd	39446.7	2087.48	7567.7	352681	6596.85	0.549583	6.94535	70.5371	128.346	19.8574	1.23594	0.0531908	1.30952	0.369165	1.80067	0.050359	1.23594	0.686381	319.06	9.86	316.98	7.68	334.3	59.2	317.24	7.62	0.76	316.543	7.62654	317.24	7.62
				14		bd	389940	20959.1	17256.2	976267	65495.8	97.698	4555.75	326562	3342.56	19.8315	1.69992	0.0529723	1.13035	0.368128	2.04143	0.0504248	1.69992	0.832712	318.24	11.16	316.98	10.52	327.5	51.8	317.39	10.32	0.46	317.034	10.5061	317.39	10.32
				44		bd	39131.2	2071.75	6304.62	297012	6258.38	0.487865	6.71984	59.4031	121.761	19.2792	1.34551	0.0526186	1.46005	0.376147	1.98548	0.0518694	1.34551	0.677672	324.16	11.06	326.18	8.6	309.7	66.6	325.89	8.5	-0.72	326.115	8.55521	325.89	8.5
				13		bd	176554	10129.8	15862.2	912791	30934.2	193.403	2155.18	305329	1578.72	19.26	1.77141	0.0525523	1.20273	0.376046	2.14113	0.0519209	1.77141	0.827322	324.09	11.88	326.18	11.26	309.1	54.6	325.45	10.98	-0.74	326.46	11.2735	325.45	10.98
				32		bd	330252	20929.6	32769.9	852511	51180	0.171233	54.309	170.504	995.744	18.923	2.97219	0.06248	0.882893	0.455048	3.10055	0.0528457	2.97219	0.958601	380.77	19.7	331.69	19.2	691.2	37.4	299.9	25	16	328.151	18.7668	299.9	25
				43		bd	33846.8	1803.69	4947.3	228295	5435.08	0.431797	5.74246	45.6596	105.743	19.1449	1.18326	0.0523917	1.30103	0.37715	1.75863	0.0522331	1.18326	0.67283	324.98	9.8	328.01	7.56	303.3	59.8	327.58	7.48	-1.1	328.456	7.57948	327.58	7.48
				21		bd	86484	4593.9	9367.26	497129	13963.5	0.365984	14.2077	99.427	271.67	19.0463	1.23748	0.0528658	1.29594	0.382534	1.79188	0.0525036	1.23748	0.690608	328.88	10.06	329.85	7.98	322	59	329.7	7.9	-0.34	329.938	7.9571	329.7	7.9
				7		bd	47970.9	2843.3	7826.02	241940	5874.9	269.921	623.957	80929	299.824	15.1772	7.14228	0.0580469	1.77204	0.527101	7.35882	0.0658884	7.14228	0.970574	429.9	51.6	411.4	57	530.2	78.6	449.4	53.2	5.3	409.806	56.2531	449.4	53.2
				33		bd	225605	13715.2	21538.5	510854	26265.3	0.199941	36.8979	102.172	511.011	14.3439	1.10135	0.0605815	1.0179	0.582075	1.4997	0.069716	1.10135	0.734381	465.81	11.22	434.35	9.26	624	44.4	438.24	9.36	8.4	431.799	9.13546	438.24	9.36
				39		bd	38277	2191.46	7440.52	173420	5107.95	0.349011	6.77661	34.6843	99.3788	13.3663	4.00521	0.0576716	1.8066	0.594643	4.39381	0.0748149	4.00521	0.911558	473.8	33.2	465	36	516.6	80	473.1	33.8	2.3	464.342	35.728	473.1	33.8
				3		bd	86943.2	5824.44	7727.26	148477	14023.2	69.3972	1069.31	49665.5	715.67	12.4296	9.65743	0.0648686	2.11253	0.719255	9.88578	0.080453	9.65743	0.976901	550.3	84	499.1	92.8	768	83	668.4	71.8	12	494.218	90.3721	668.4	71.8
				19		bd	370614	22455.5	4814.6	137927	33132.7	0.0427938	56.2798	27.5858	644.62	10.4827	1.12732	0.0598621	1.22686	0.787018	1.66614	0.0953953	1.12732	0.676603	589.47	14.96	587.39	12.7	597.5	53.2	587.92	12.38	0.45	587.15	12.6358	587.92	12.38
				38		bd	233049	14110.8	84589.9	1989123	19907.5	1.02715	46.9252	397.83	387.315	10.1924	1.39888	0.0599713	0.982994	0.810911	1.70972	0.0981124	1.39888	0.818192	602.96	15.58	603.26	16.14	601.8	42.6	603.08	15.08	-0.065	603.353	16.0948	603.08	15.08
				24		bd	179411	11581.8	13854.1	293551	13999.5	0.215556	28.975	58.7109	272.369	9.22904	1.2333	0.0638032	1.13126	0.952779	1.67355	0.108354	1.2333	0.736933	679.56	16.58	663.45	15.52	733.3	47.8	669.2	15.1	3.1	661.516	15.4482	669.2	15.1
				34		bd	450752	28534.5	73221.2	1628960	35233.3	0.475275	78.151	325.796	685.489	9.16421	1.20594	0.0622547	0.987447	0.936232	1.55863	0.10912	1.20594	0.773715	670.89	15.34	667.52	15.36	682.2	42.8	669.21	14.48	0.66	667.287	15.2627	669.21	14.48
				40		bd	12045.3	777.423	1518.53	32628.7	892.707	0.375733	2.02853	6.52582	17.3683	8.84693	1.90408	0.0640446	1.81157	0.99769	2.62818	0.113034	1.90408	0.724487	702.6	26.6	690.1	24.8	742.8	77.4	694.7	24	2.4	689.06	24.7904	694.7	24
				29		bd	179654	12072.2	25131.1	478330	11212.5	0.438545	30.674	95.6672	218.147	7.35953	1.24289	0.0664884	1.07134	1.24509	1.6409	0.135878	1.24289	0.757446	821.19	18.5	821.44	19.14	820.5	44.8	821.3	17.62	-0.041	821.298	19.1399	821.3	17.62
				31		bd	606682	69985.1	78440.4	699758	15624.3	0.460401	106.808	139.953	303.982	3.079	1.06702	0.114468	0.875876	5.12368	1.38047	0.324781	1.06702	0.772941	1840	23.6	1813.1	33.8	1870.6	32.2	1843.5	23.6	2.4	1805.71	33.3662	1843.5	23.6
Naxos	Leucogranite	CHSZ	TLN10	34		bd	88582.3	4376.35	943.815	855066	333190	0.0227174	15.8579	187.596	8257.83	484.002	1.48712	0.048616	1.22807	0.0138433	1.92865	0.00206611	1.48712	0.771068	13.92	0.54	13.52	0.4	82.4	58.6	13.51	0.4	2.9	13.2663	0.393	13.2663	0.393
				25		bd	93680.8	4393.9	3499.02	4021666	334718	0.10636	17.1533	882.329	8295.7	477.953	1.52214	0.0479329	1.32364	0.0138215	2.01716	0.00209226	1.52214	0.754595	13.92	0.56	13.52	0.42	82.4	63.6	13.51	0.42	2.9	13.4457	0.408042	13.4457	0.408042
				26		bd	72806.7	3483.12	803.186	759661	259900	0.025874	13.0191	166.665	6441.41	462.521	1.48161	0.0475541	1.38761	0.0141698	2.02994	0.00216206	1.48161	0.729881	14.32	0.58	14.17	0.42	39.7	66.6	14.17	0.42	1.1	13.9007	0.410805	13.9007	0.410805
				39		bd	53883.3	2571.93	291.329	197247	189488	0.00921466	9.58312	43.2749	4696.31	455.155	1.63783	0.0474521	1.5435	0.0143682	2.25053	0.00219706	1.63783	0.727754	14.52	0.64	14.17	0.46	73	73.2	14.16	0.46	2.5	14.1273	0.461576	14.1273	0.461576
				20		bd	65503.4	3178.07	759.077	549255	231442	0.0210079	11.7268	120.503	5736.1	449.375	1.35209	0.0476249	1.27056	0.014606	1.85539	0.00222531	1.35209	0.728736	14.72	0.54	14.17	0.38	105.7	60.2	14.14	0.38	3.8	14.3057	0.385774	14.3057	0.385774
				8		bd	361600	17400.6	5110.68	3665055	1210826	0.0267947	64.8671	804.091	30009.3	440.079	1.53729	0.0488195	1.0408	0.0152886	1.85649	0.00227232	1.53729	0.828066	15.42	0.56	14.81	0.46	111.4	49.2	14.76	0.46	4.1	14.5856	0.446511	14.5856	0.446511
				19		bd	48283.6	2354.38	172.752	93065.9	160606	0.00512954	8.5807	20.4181	3980.49	428.474	1.69651	0.0482028	1.88876	0.0155043	2.53881	0.00233386	1.69651	0.66823	15.62	0.78	14.81	0.5	141.9	88.6	14.78	0.5	5.4	14.992	0.506871	14.992	0.506871
				10		bd	81478.5	4022.72	341.854	272460	268538	0.00898145	14.4968	59.776	6655.5	423.205	1.46475	0.048026	1.17164	0.0156398	1.87569	0.00236292	1.46475	0.780911	15.72	0.58	15.45	0.46	56.4	56.2	15.45	0.46	1.7	15.1819	0.443267	15.1819	0.443267
				6		bd	67841.5	3893.1	1716.46	194150	221170	0.00777077	12.4041	42.5954	5481.5	414.928	1.59126	0.0562509	1.31313	0.0186837	2.06311	0.00241006	1.59126	0.771292	18.81	0.76	15.45	0.5	472.5	58.4	14.78	0.48	20	15.3232	0.480987	15.3232	0.480987
				28		bd	100060	4866.42	328.956	202188	325458	0.00549933	17.775	44.3588	8066.21	419.238	1.56259	0.0474391	1.17908	0.0155949	1.95753	0.00238528	1.56259	0.798245	15.72	0.62	15.45	0.48	56.4	56.2	15.45	0.48	1.7	15.3369	0.478051	15.3369	0.478051
				40		bd	47972.5	2309.21	148.534	95447.2	151665	0.00557094	8.51645	20.9405	3758.89	415.57	1.5767	0.04807	1.37462	0.0159417	2.09179	0.00240633	1.5767	0.753758	16.02	0.66	15.45	0.48	101.7	65.6	15.44	0.48	3.6	15.4598	0.485843	15.4598	0.485843
				3		bd	59059.8	2897.32	266.776	175236	192518	0.00805753	10.5081	38.4457	4771.41	413.772	1.56429	0.0487039	1.59967	0.0162222	2.23739	0.00241679	1.56429	0.699156	16.32	0.72	15.45	0.48	145.7	75.2	15.41	0.48	5.5	15.5144	0.483333	15.5144	0.483333
				2		bd	61065.4	2927.01	180.891	153047	195633	0.00692523	10.8373	33.5776	4848.59	413.45	1.43799	0.0474909	1.14686	0.0158304	1.83932	0.00241867	1.43799	0.781806	15.92	0.58	15.45	0.44	86.7	54.8	15.44	0.44	3	15.5504	0.446024	15.5504	0.446024
				5		bd	28352.1	1410.83	68.3364	50185.9	90934.4	0.00488545	5.03777	11.0105	2253.73	412.969	1.51219	0.0483101	1.79929	0.0161223	2.35035	0.00242149	1.51219	0.643388	16.22	0.76	15.45	0.46	131.2	85	15.43	0.46	4.9	15.5523	0.468609	15.5523	0.468609
				32		bd	99247.6	4815.84	485.841	279996	318704	0.00777708	17.6558	61.4295	7898.79	411.812	1.45903	0.0479553	1.21846	0.0160489	1.9009	0.00242829	1.45903	0.767546	16.12	0.6	15.45	0.46	116.5	57.4	15.42	0.46	4.2	15.603	0.453813	15.603	0.453813
				13		bd	67023.8	3283.81	302.913	189658	212775	0.00789043	11.9244	41.6098	5273.44	408.644	1.39547	0.0486238	1.3027	0.0163987	1.90902	0.00244712	1.39547	0.730986	16.52	0.62	15.45	0.44	174.4	61	15.39	0.44	6.7	15.7105	0.436663	15.7105	0.436663
				24		bd	95620.7	4668.72	527.906	254383	310602	0.00724994	17.0256	55.81	7698	408.216	1.40621	0.048241	1.14081	0.0162866	1.81077	0.00244968	1.40621	0.776584	16.42	0.58	15.45	0.44	160.1	53.2	15.38	0.44	6.1	15.7346	0.440912	15.7346	0.440912
				1		bd	65923.2	3173.29	200.697	116693	207689	0.00497374	11.7026	25.6017	5147.39	404.785	1.70061	0.0471544	1.59168	0.0160548	2.32927	0.00247045	1.70061	0.730104	16.22	0.76	16.1	0.54	34.3	76.4	16.1	0.54	0.76	15.8897	0.539209	15.8897	0.539209
				23		bd	126133	6058.58	516.578	300380	395413	0.00672466	22.4112	65.9015	9799.98	402.783	1.51946	0.0472007	1.33027	0.0161504	2.0195	0.00248272	1.51946	0.752394	16.32	0.66	16.1	0.48	49.1	64	16.09	0.48	1.4	15.9677	0.484107	15.9677	0.484107
				12		bd	45089.5	2216.64	296.666	100272	140381	0.00632297	8.03896	21.999	3479.22	401.287	1.29879	0.0494246	1.22627	0.0169744	1.78622	0.00249198	1.29879	0.727115	17.12	0.6	16.1	0.42	163	57.4	16.03	0.42	6.2	15.9821	0.413012	15.9821	0.413012
				9		bd	43182.5	2101.07	206.342	121630	135750	0.00793144	7.68214	26.685	3364.46	400.919	1.69044	0.0484583	1.57504	0.0166578	2.31048	0.00249427	1.69044	0.731638	16.82	0.78	16.1	0.54	121.2	74.6	16.07	0.54	4.4	16.0164	0.53936	16.0164	0.53936
				11		bd	67474.1	3233.87	294.121	206447	214018	0.00853901	11.9905	45.2931	5304.26	401.179	1.48462	0.0474077	1.11062	0.0162861	1.85407	0.00249265	1.48462	0.800736	16.42	0.6	16.1	0.48	63.8	53	16.09	0.48	2	16.0273	0.474647	16.0273	0.474647
				17		bd	47933.6	2307.07	144.059	92942	148456	0.00554199	8.50876	20.3909	3679.35	400.549	1.49098	0.0475059	1.48602	0.0163455	2.10506	0.00249658	1.49098	0.708282	16.42	0.68	16.1	0.48	63.8	71	16.09	0.48	2	16.0505	0.477309	16.0505	0.477309
				31		bd	46722.7	2313.48	215.673	73273.6	146551	0.00442598	8.31745	16.0758	3632.14	398.619	1.46501	0.0499106	1.69453	0.017256	2.24002	0.00250866	1.46501	0.654017	17.42	0.78	16.1	0.48	203.7	79.2	16.04	0.48	7.9	16.0791	0.468406	16.0791	0.468406
				33		bd	31185.7	1557.26	119.578	63801.4	91340.5	0.00618326	5.54969	13.9976	2263.8	385.112	1.76004	0.0479213	1.53227	0.0171494	2.33358	0.00259665	1.76004	0.754224	17.22	0.8	16.74	0.58	84.4	73.2	16.73	0.58	2.8	16.6845	0.585369	16.6845	0.585369
				37		bd	91695.7	4265.85	278.695	180559	271275	0.00589196	16.2526	39.6135	6723.31	385.396	1.70416	0.0464152	1.62192	0.0165981	2.35262	0.00259473	1.70416	0.72437	16.72	0.78	16.74	0.56	13.6	78.6	16.74	0.56	-0.13	16.704	0.56853	16.704	0.56853
				35		bd	37262.1	1818.36	353.956	87387.3	106080	0.00729234	6.65952	19.1722	2629.09	369.904	1.79062	0.0475432	1.72885	0.0177136	2.48903	0.00270341	1.79062	0.719408	17.82	0.88	17.38	0.62	76.7	82.2	17.37	0.62	2.5	17.3782	0.620573	17.3782	0.620573
				30		bd	21403.1	1032.17	114.89	48514.5	63866.9	0.00672428	3.80818	10.6438	1582.89	369.309	1.92398	0.0475048	1.88147	0.0177278	2.69102	0.00270776	1.92398	0.71496	17.82	0.96	17.38	0.66	76.7	90.2	17.38	0.66	2.5	17.407	0.667923	17.407	0.667923
				36		bd	31099.4	1602.17	1621.32	212872	86964.3	0.0216685	5.79631	46.7029	2155.34	361.66	1.82307	0.0505415	1.95847	0.0192599	2.67566	0.00276503	1.82307	0.681351	19.41	1.04	18.02	0.66	194.6	91.4	17.95	0.66	7.5	17.7065	0.641305	17.7065	0.641305
				15		bd	116918	5971.41	963.642	435955	314008	0.01229	20.9158	95.6458	7782.42	361.034	2.63288	0.0492819	1.23904	0.0188124	2.90986	0.00276982	2.63288	0.904814	18.91	1.1	18.02	0.94	133.2	59.8	17.89	0.94	4.8	17.7655	0.930716	17.7655	0.930716
				38		bd	80630.7	3877.26	300.746	204997	236129	0.00768508	14.3221	44.975	5852.25	361.034	1.84907	0.0466725	1.6116	0.0178164	2.45282	0.00276983	1.84907	0.753855	17.91	0.88	18.02	0.66	3.18	78.2	18.02	0.66	-0.62	17.8243	0.65799	17.8243	0.65799
				14		bd	22599.4	1310.98	3269.31	376502	58691.9	0.0567858	4.58999	82.6022	1454.63	337.105	1.66656	0.0584344	1.80379	0.0238896	2.45583	0.00296643	1.66656	0.678614	23.98	1.16	19.31	0.64	521.4	79.2	18.7	0.64	22	18.8045	0.616399	18.8045	0.616399
				16		bd	126396	5993.84	592.602	219908	249890	0.00779011	22.4575	48.2466	6193.31	279.418	4.7094	0.0473617	1.23532	0.0233604	4.86872	0.00357887	4.7094	0.967276	23.49	2.26	23.17	2.18	56.4	56.6	23.13	2.18	1.4	23.0043	2.16012	23.0043	2.16012
				4		bd	18988	1142.12	5668.94	507727	40367.3	0.11134	4.35683	111.392	1000.47	260.371	3.8468	0.0577455	2.38929	0.0305654	4.52842	0.00384067	3.8468	0.84948	30.6	2.74	24.45	1.88	544.9	104.4	22.13	1.8	23	24.3609	1.84394	24.3609	1.84394
				27		bd	10102.6	654.155	8047.76	674638	18138.7	0.329242	3.17562	148.011	449.553	232.668	3.22075	0.0597853	3.15607	0.035413	4.50933	0.00429796	3.22075	0.714242	35.32	3.14	27.66	1.78	593	137.8	26.43	1.74	25	27.1862	1.71832	27.1862	1.71832
				29		bd	16421.2	1099.78	5526.66	654530	21762.8	0.266235	3.89219	143.6	539.372	170.025	1.83576	0.065819	1.93853	0.0533514	2.66982	0.0058815	1.83576	0.687599	52.82	2.74	37.92	1.4	795	81.2	35.35	1.36	34	36.8958	1.31855	36.8958	1.31855
				7		bd	17425.1	1773.29	13504.3	1273386	16303.8	0.691387	5.52269	279.373	404.076	121.813	2.55401	0.100041	2.27982	0.113186	3.42353	0.00820929	2.55401	0.746018	108.89	7.06	52.65	2.68	1626.4	84.4	38.81	2.3	74	49.1883	2.33974	49.1883	2.33974
				18		bd	27195.2	1554.71	4666.38	718065	15098.8	0.42099	5.6432	157.539	374.211	72.0386	1.54012	0.0579126	2.18543	0.110793	2.67358	0.0138814	1.54012	0.576049	106.7	5.42	88.99	2.72	522.7	95.6	87.86	2.72	19	87.7419	2.64994	87.7419	2.64994
				21		bd	330684	20062.2	59683.7	1662510	36056.9	0.408157	69.3117	364.745	893.639	14.1053	1.49325	0.0595338	1.07241	0.581686	1.83844	0.0708955	1.49325	0.812239	465.55	13.76	441.58	12.72	585.6	47	447.69	12.84	6.4	439.517	12.616	447.69	12.84
				22		bd	417173	25322.9	55587.8	1355828	39816.3	0.301435	84.1143	297.46	986.813	12.075	1.83829	0.0595474	1.31691	0.679645	2.26132	0.0828159	1.83829	0.812928	526.53	18.58	512.81	18.14	586.5	57.8	518.53	17.74	3.3	511.682	18.015	518.53	17.74
Tinos	Dacite Dyke	E Kolimpithra	TLT64	TLT64_02		bd	3654.61	199.885	259.318	238341	1488363	0.2046	1.40091	128.53	628.204	433.41	1.89834	0.0559142	3.55281	0.0177799	4.02817	0.00230728	1.89834	0.471267	17.91	0.72	14.81	0.28	457.5	78.9	14.69	0.28	19	14.6766	0.549964	14.6766	0.549964
				TLT64_03a		bd	2792.59	153.472	336.822	312891	1127058	0.3547	1.11794	168.733	475.706	424.552	1.86369	0.0543344	3.63165	0.017638	4.08194	0.00235543	1.86369	0.456569	17.72	0.72	15.45	0.29	336.8	82.1	15.38	0.29	14	15.0129	0.553366	15.0129	0.553366
				TLT64_03b		bd	11124.3	576.049	1573.07	1558895	4675341	0.426009	4.5201	840.667	1973.36	443.864	1.4246	0.0511841	2.35524	0.0158925	2.75257	0.00225294	1.4246	0.517552	16.02	0.44	14.81	0.21	201.4	54.6	14.78	0.21	7.9	14.418	0.407822	14.418	0.407822
				TLT64_05		bd	20799	1033.01	1404.96	1340019	8703351	0.196716	7.91305	722.633	3673.49	447.693	1.25519	0.0483715	1.65998	0.0148907	2.08112	0.00223367	1.25519	0.603132	15.02	0.31	14.17	0.18	153.6	39	14.15	0.18	5.9	14.3459	0.358795	14.3459	0.358795
				TLT64_06		bd	3888.47	268.151	604.174	383084	1579045	0.309966	1.62123	206.586	666.479	431.968	2.07749	0.0696514	5.29512	0.022222	5.68808	0.00231498	2.07749	0.365235	22.29	1.25	14.81	0.31	928	109	14.55	0.31	41	14.4667	0.584419	14.4667	0.584419
				TLT64_07a		bd	19833.7	978.702	1310.34	1227949	8143525	0.192656	7.5336	662.197	3437.2	442.217	1.23331	0.0485188	1.91052	0.015121	2.27401	0.00226133	1.23331	0.54235	15.22	0.34	14.81	0.18	80.2	45.4	14.81	0.18	2.7	14.5207	0.356768	14.5207	0.356768
				TLT64_07b		bd	7033.96	355.7	850.631	654615	2794166	0.299329	2.80612	353.015	1179.35	426.254	1.51428	0.0510874	2.93577	0.0165178	3.30329	0.00234602	1.51428	0.458414	16.62	0.54	14.81	0.22	286.7	67	14.76	0.22	12	15.015	0.451493	15.015	0.451493
				TLT64_08		bd	22076	1157.96	1568.76	1375148	9285204	0.189223	8.44625	741.578	3919.07	449.132	1.46839	0.0519426	1.94836	0.0159388	2.43973	0.00222652	1.46839	0.601865	16.02	0.39	14.17	0.21	303.6	44.5	14.07	0.21	12	14.2353	0.414631	14.2353	0.414631
				TLT64_13		bd	22842.9	1108.56	1545.09	1385696	9092553	0.194714	8.6825	747.266	3837.76	430.341	1.3859	0.0480117	1.53328	0.0153759	2.0668	0.00232374	1.3859	0.670553	15.52	0.32	14.81	0.21	126.7	36.2	14.79	0.21	4.7	14.9307	0.412479	14.9307	0.412479
				TLT64_14		bd	8119.08	400.617	865.953	785700	3250535	0.308828	3.19616	423.705	1371.98	429.148	1.6051	0.0486934	2.77976	0.0156376	3.20989	0.0023302	1.6051	0.500049	15.72	0.5	14.81	0.24	157	65.1	14.8	0.24	6	14.9592	0.478222	14.9592	0.478222
				TLT64_16		bd	7284.9	514.787	1686.85	1117023	2840084	0.502512	3.23051	602.378	1198.73	421.443	1.76247	0.0720031	5.20367	0.023546	5.49404	0.0023728	1.76247	0.320797	23.59	1.28	15.45	0.27	958	106	15.25	0.27	42	14.7823	0.506016	14.7823	0.506016
				TLT64_17		bd	7794.53	387.902	1437.47	1326121	3114360	0.544038	3.27593	715.139	1314.5	427.808	1.69752	0.0490857	2.75595	0.0158129	3.2368	0.0023375	1.69752	0.524446	15.92	0.51	14.81	0.25	186.7	64.5	14.79	0.25	7.3	14.9986	0.506836	14.9986	0.506836
				TLT64_01	inherited	bd	80320.3	4096.04	15656.2	1188071	2604618	0.582792	34.0784	640.692	1099.35	34.2617	1.34646	0.0508575	0.92283	0.204575	1.63235	0.0291871	1.34646	0.824858	189.01	2.81	185.54	2.47	232.6	21.7	186.05	2.47	2	185.215	4.90827	186.05	2.47
				TLT64_04a	inherited	bd	64305.7	3306.23	9568.92	734370	2101641	0.446448	26.2829	396.024	887.055	34.2495	1.47888	0.0510023	1.20779	0.20523	1.90941	0.0291975	1.47888	0.774522	189.52	3.3	185.54	2.71	239.4	28.2	185.91	2.71	2.3	185.247	5.39074	185.91	2.71
				TLT64_04b	inherited	bd	10598.9	530.008	3143.96	240231	349364	0.87855	4.86045	129.55	147.459	35.2108	1.60468	0.050823	2.28752	0.198925	2.79424	0.0284003	1.60468	0.574283	184.2	4.7	180.53	2.85	231.5	53	180.64	2.85	2.2	180.275	5.69491	180.64	2.85
				TLT64_09	inherited	bd	38368.8	1894.96	14715.8	1174713	1205465	1.24507	18.7225	633.489	508.8	33.8562	1.32716	0.0497012	1.44444	0.202318	1.96157	0.0295366	1.32716	0.676582	187.07	3.35	187.42	2.46	182.7	33.5	187.39	2.45	-0.2	187.681	4.90886	187.39	2.45
				TLT64_10b	inherited	bd	19519.8	1017.49	3899.15	290438	624694	0.594019	8.3215	156.625	263.669	33.8945	1.56737	0.0505971	1.6264	0.205732	2.25872	0.0295033	1.56737	0.693918	189.94	3.92	187.42	2.9	221.4	37.9	187.59	2.9	1.5	187.263	5.77765	187.59	2.9
				TLT64_11	inherited	bd	95056.3	4799.4	8270.31	618708	3079504	0.256696	36.8209	333.651	1299.79	34.4293	1.26937	0.0493811	0.997967	0.197669	1.6147	0.0290451	1.26937	0.786138	183.18	2.7	184.29	2.31	168.9	23.2	184.12	2.29	-0.66	184.66	4.62221	184.12	2.29
				TLT64_12	inherited	bd	84034.7	4291.02	14066.6	1072143	2842396	0.481929	34.8683	578.176	1199.71	36.3602	1.3584	0.0508823	1.20654	0.192862	1.81687	0.0275026	1.3584	0.747663	179.1	2.99	174.88	2.35	235.1	27.9	175.12	2.35	2.6	174.614	4.67086	175.12	2.35
				TLT64_15	inherited	bd	103277	5193.27	16807.9	1272668	3267098	0.4977	42.6617	686.313	1378.97	33.9437	1.3247	0.0493201	0.926784	0.200249	1.61672	0.0294605	1.3247	0.81938	185.3	2.75	187.42	2.44	158.3	21.8	187.02	2.42	-1.2	187.29	4.89201	187.02	2.42
				TLT64_18	inherited	bd	94349.3	4666.03	14226.5	1079150	2974599	0.46352	38.563	581.954	1255.51	33.7329	1.20151	0.0491095	1.03866	0.20064	1.58822	0.0296446	1.20151	0.756514	185.63	2.7	188.04	2.23	155.1	24.3	187.74	2.21	-1.4	188.499	4.46674	187.74	2.21
				TLT64_10a	high cm-pb	1349.88	2742007	412520	203446	6712058	11998280	0.714746	1143.51	3619.62	5064.2	4.6438	1.23323	0.144502	0.737373	4.28851	1.43686	0.215341	1.23323	0.85828	1691.2	11.9	1257	14.1	2281.4	13	840.1	17.5	43	1167.78	24.2813	840.1	17.5
Tinos	Dacite Dyke	E Mt Tsiknias	17TL36	17TL_36_01		bd	5889.61	300.048	1116.14	941565	2465333	0.487966	2.48789	507.759	1040.56	443.869	1.70613	0.0509205	2.52814	0.0158104	3.04998	0.00225292	1.70613	0.559391	15.92	0.48	14.81	0.25	186.7	58.9	14.78	0.25	7.3	14.4226	0.488729	14.4226	0.488729
				17TL_36_02		bd	4654.37	243.253	660.413	600698	1867424	0.410987	1.89272	323.939	788.197	436.918	1.82534	0.0497575	2.9906	0.0156951	3.50365	0.00228876	1.82534	0.520982	15.82	0.55	14.81	0.27	171.9	69.8	14.79	0.27	6.6	14.6736	0.532747	14.6736	0.532747
				17TL_36_03		bd	4736.78	299.719	510.575	503606	1976525	0.325539	1.88898	271.58	834.246	452.93	1.7533	0.0613605	3.5368	0.0186708	3.94753	0.00220785	1.7533	0.44415	18.81	0.74	14.17	0.25	661.9	76	13.97	0.25	29	13.9467	0.479576	13.9467	0.479576
				17TL_36_04		bd	16657.7	830.101	1593.27	1503597	6723385	0.285732	6.49781	810.846	2837.79	430.759	1.42626	0.0492286	1.69041	0.0157503	2.21172	0.00232148	1.42626	0.644866	15.92	0.35	14.81	0.21	186.7	39.6	14.77	0.21	7.3	14.8932	0.422778	14.8932	0.422778
				17TL_36_05		bd	61105.4	2918.33	4613.02	4198797	24535930	0.218644	23.3733	2264.29	10356.1	433.356	1.26743	0.0477722	1.29392	0.0151927	1.81124	0.00230757	1.26743	0.699755	15.32	0.28	14.81	0.19	95.9	30.7	14.8	0.19	3.4	14.8314	0.374827	14.8314	0.374827
				17TL_36_06		bd	1015.79	75.2471	114.416	80074.8	411780	0.248454	0.4105	43.182	173.803	431.99	3.35297	0.073194	7.28287	0.0233511	8.01765	0.00231487	3.35297	0.418199	23.49	1.86	14.81	0.5	1036	147	14.39	0.49	46	14.3992	0.934391	14.3992	0.934391
				17TL_36_07		bd	16469.5	821.711	1061.99	1011708	6739311	0.191803	6.24995	545.585	2844.51	443.434	1.26804	0.0499889	1.76152	0.0155364	2.17046	0.00225513	1.26804	0.584229	15.62	0.34	14.81	0.19	141.9	41.5	14.79	0.19	5.4	14.4539	0.364453	14.4539	0.364453
				17TL_36_08		bd	1566.13	106.83	85.6019	65176.2	602607	0.138188	0.598856	35.1477	254.347	434.091	2.93806	0.0671195	5.36352	0.0213095	6.11552	0.00230366	2.93806	0.480427	21.4	1.3	14.81	0.43	843	112	14.4	0.43	37	14.4435	0.826417	14.4435	0.826417
				17TL_36_09		bd	5816.84	283.771	622.614	600619	2340713	0.327843	2.2895	323.896	987.962	431.807	1.79084	0.0479875	3.00637	0.0153159	3.49934	0.00231585	1.79084	0.511766	15.42	0.54	14.81	0.26	111.4	71.1	14.8	0.26	4.1	14.8805	0.531224	14.8805	0.531224
				17TL_36_10		bd	6677.81	576.232	949.923	248337	2652427	0.119622	2.79375	133.921	1119.53	427.947	1.67613	0.0855122	3.53666	0.0275387	3.91375	0.00233674	1.67613	0.428268	27.55	1.06	14.81	0.25	1354.2	68.1	14.12	0.24	62	14.3009	0.457863	14.3009	0.457863
				17TL_36_11		bd	2402.68	137.002	109.331	99245.8	997273	0.127149	0.902087	53.5204	420.926	444.8	2.03083	0.0565362	3.99387	0.0175173	4.48054	0.0022482	2.03083	0.453256	17.62	0.78	14.17	0.29	518.1	87.9	14.03	0.29	22	14.2897	0.57243	14.2897	0.57243
				17TL_36_12		bd	8369.14	461.267	895.428	777498	3465341	0.286661	3.31201	419.282	1462.64	442.48	1.51507	0.0542488	3.23704	0.0168967	3.57405	0.00225999	1.51507	0.423909	17.02	0.6	14.81	0.22	341.2	73.4	14.76	0.22	14	14.4066	0.431769	14.4066	0.431769
				17TL_36_13		bd	8513.03	426.804	927.99	846421	3395448	0.318496	3.36036	456.45	1433.14	429.576	1.43238	0.0495304	2.2863	0.0158905	2.69794	0.00232787	1.43238	0.530916	16.02	0.43	14.81	0.21	201.4	53.2	14.78	0.21	7.9	14.9285	0.425437	14.9285	0.425437
				17TL_36_14		bd	4842.11	255.537	477.497	456656	2072096	0.281575	1.89854	246.261	874.585	459.358	1.65748	0.0507144	3.07186	0.0152155	3.4905	0.00217695	1.65748	0.474854	15.32	0.53	14.17	0.24	200.1	71.6	14.15	0.23	7.9	13.9403	0.459055	13.9403	0.459055
Tinos	Dacite Dyke	Kionnia	17TL05	17TL05_01		bd	32924.2	1551.97	2115.19	1703876	13755190	0.201846	8.90083	838.241	4152.87	448.5	1.20781	0.0461001	1.19021	0.0141659	1.6957	0.00222965	1.20781	0.712279	14.32	0.24	14.17	0.17	39.7	28.7	14.17	0.17	1.1	14.3613	0.346617	14.3613	0.346617
				17TL05_02a		bd	4716.8	434.03	1530.24	833702	1845939	0.73594	1.62516	410.149	557.313	408.455	2.49181	0.11393	10.6858	0.0384413	10.9725	0.00244825	2.49181	0.227096	38.26	4.12	15.45	0.38	1896	192	15.15	0.38	90	14.4165	0.707058	14.4165	0.707058
				17TL05_02b		bd	18224.6	918.149	1251.51	961930	7692672	0.203758	4.96088	473.232	2322.52	446.676	1.25236	0.0493561	1.76808	0.0152284	2.16669	0.00223876	1.25236	0.578008	15.32	0.33	14.17	0.18	200.1	41.1	14.13	0.18	7.9	14.3606	0.35791	14.3606	0.35791
				17TL05_04		bd	26226.1	1311.05	1170.69	988713	11162310	0.144333	6.98316	486.409	3370.04	459.283	1.21126	0.0490021	1.45629	0.0147042	1.89418	0.00217731	1.21126	0.639461	14.82	0.28	14.17	0.17	121.8	34.3	14.15	0.17	4.5	13.973	0.336975	13.973	0.336975
				17TL05_05		bd	32301.5	1875.54	3191.58	1893455	13209740	0.233566	9.08991	931.507	3988.19	436.423	1.31741	0.0574324	4.68789	0.0181366	4.86948	0.00229136	1.31741	0.270545	18.21	0.88	14.81	0.2	494	103	14.77	0.2	21	14.5471	0.377954	14.5471	0.377954
				17TL05_06		bd	3028.43	175.679	266.523	231122	1230607	0.306035	0.844228	113.703	371.536	438.279	1.84599	0.0573607	3.51038	0.0180372	3.96616	0.00228165	1.84599	0.465435	18.11	0.71	14.81	0.27	482.2	77.4	14.67	0.27	20	14.4868	0.526962	14.4868	0.526962
				17TL05_07		bd	2482.75	158.868	274.969	191775	986816	0.316668	0.709457	94.3458	297.932	442.284	1.99144	0.0622159	3.90184	0.0193868	4.38066	0.00226099	1.99144	0.454598	19.51	0.85	14.81	0.29	645.4	84.1	14.6	0.29	28	14.2664	0.556599	14.2664	0.556599
				17TL05_08		bd	27804.5	1353.94	1321.61	1023256	11125380	0.149871	7.41426	503.402	3358.9	439.893	1.27552	0.0483652	1.68376	0.0151527	2.11235	0.00227328	1.27552	0.60384	15.32	0.32	14.81	0.19	95.9	40	14.81	0.19	3.4	14.6002	0.371067	14.6002	0.371067
				17TL05_09		bd	3979.38	426.303	915.695	297714	1557050	0.311563	1.29442	146.464	470.093	423.772	2.24148	0.0882226	6.90255	0.0286916	7.25737	0.00235976	2.24148	0.308856	28.73	2.06	15.45	0.35	1355	133	15.11	0.34	62	14.3896	0.619177	14.3896	0.619177
				17TL05_10		bd	19450.8	967.417	1575.1	1260064	7748478	0.264988	5.34986	619.903	2339.37	428.686	1.31484	0.0484449	1.47725	0.0155745	1.97764	0.00233271	1.31484	0.66485	15.72	0.31	14.81	0.19	157	34.9	14.78	0.19	6	14.9801	0.392409	14.9801	0.392409
				17TL05_12		bd	38889.3	1898.36	2693.95	2014878	16078460	0.204199	10.5769	991.242	4854.29	447.392	1.11238	0.0484995	1.38958	0.0149401	1.77998	0.00223517	1.11238	0.624939	15.02	0.27	14.17	0.16	153.6	32.8	14.14	0.16	5.9	14.3532	0.318084	14.3532	0.318084
				17TL05_13	rej from age calc	bd	3734.12	201.11	348.303	246109	1472152	0.272411	1.04197	121.076	444.461	415.416	1.77352	0.0513151	3.41901	0.0170242	3.85162	0.00240722	1.77352	0.460459	17.12	0.65	15.45	0.27	257.6	78.6	15.42	0.27	10	15.4019	0.542245	15.4019	0.542245
				17TL05_14		bd	18799.9	896.481	2818.26	2418020	7666457	0.513942	5.47667	1189.57	2314.6	449.686	1.3338	0.0484611	1.66592	0.0148522	2.13408	0.00222377	1.3338	0.624999	15.02	0.32	14.17	0.19	153.6	39.2	14.14	0.19	5.9	14.2807	0.379491	14.2807	0.379491
				17TL05_15		bd	2572.15	144.553	217.268	174507	1036875	0.274243	0.713686	85.8507	313.046	432.067	2.28453	0.0581967	4.51218	0.0185632	5.05755	0.00231446	2.28453	0.451706	18.71	0.94	14.81	0.34	554.2	98.6	14.65	0.34	24	14.6792	0.660147	14.6792	0.660147
				17TL05_16		bd	10747.1	544.218	1237.36	963428	4319147	0.363472	3.0476	473.969	1304.01	436.484	1.44859	0.050719	2.07527	0.0160143	2.53084	0.00229104	1.44859	0.572374	16.12	0.4	14.81	0.21	215.9	48.2	14.77	0.21	8.5	14.6702	0.422181	14.6702	0.422181
				17TL05_03	inherited	bd	120173	6510.48	5693.52	259054	2364508	0.178525	32.2006	127.445	713.875	23.7492	3.18627	0.0530321	0.893319	0.307749	3.30913	0.0421068	3.18627	0.962873	272.4	7.91	265.84	8.31	329.2	21.1	273	8.16	2.8	265.397	16.5174	273	8.16
				17TL05_11	inherited	bd	101108	5191.3	15567.5	768600	3649516	0.343174	29.6439	378.122	1101.84	37.9799	3.33048	0.0510192	0.886928	0.185134	3.44656	0.0263297	3.33048	0.966322	172.44	5.47	167.35	5.5	242.8	19.5	170.12	5.65	3.2	167.203	10.9626	170.12	5.65
Tinos	Grt-Ms Leucogranite	Livada Bay	TLTN15	TLTN15_01		bd	12777.1	1361.27	2458.82	427453	39402.6	0.135165	3.65905	175.756	1300.31	410.539	2.42914	0.0962201	10.2207	0.0323011	10.5054	0.00243582	2.42914	0.231228	32.28	3.34	15.45	0.38	1579	191	15.22	0.37	74	14.6946	0.694364	14.6946	0.694364
				TLTN15_02		bd	11441.8	631.289	543.645	373584	39344.7	0.118305	2.7815	153.607	1298.4	457.4	1.82434	0.053881	2.04623	0.0162347	2.7414	0.00218627	1.82434	0.665478	16.32	0.44	14.17	0.26	346.1	46.1	13.96	0.26	14	13.9436	0.503354	13.9436	0.503354
				TLTN15_03		bd	5375.01	435.229	918.202	399247	17312.7	0.287327	1.48337	164.158	571.329	431.657	2.05907	0.0799293	3.2374	0.0255195	3.83673	0.00231665	2.05907	0.536672	25.57	0.97	14.81	0.3	1207.1	63.7	13.8	0.29	55	14.2833	0.56392	14.2833	0.56392
				TLT15_01		bd	17096.3	985.636	3620.41	239027	4548.36	0.654777	4.78454	98.2809	150.098	35.9006	2.37304	0.059658	1.75536	0.22902	2.95171	0.0278547	2.37304	0.803954	209.37	5.58	177.39	4.15	586.5	38.5	172.08	4.19	18	174.899	8.08099	172.08	4.19
				TLT15_02		bd	42764.6	2903.96	12563.7	427526	4223.42	1.26124	12.838	175.786	139.375	13.0084	1.38524	0.067227	1.21556	0.712237	1.84295	0.0768731	1.38524	0.75164	546.05	7.78	477.59	6.4	843	25.4	480.25	6.67	16	471.336	12.4145	480.25	6.67
Tinos	Aplite Vein	SW Mt Tsiknias	TLT13	TLT13_01		bd	29209.7	1607.04	2962.6	1991769	97293.7	0.255067	7.44706	818.956	3210.74	443.301	1.45016	0.0553885	2.34215	0.0172198	2.75475	0.0022558	1.45016	0.526423	17.32	0.47	14.81	0.21	380.9	52.5	14.69	0.21	16	14.3591	0.411285	14.3591	0.411285
				TLT13_02		bd	3907.29	215.913	321.368	294547	13451.6	0.272822	0.97986	121.109	443.911	453.517	2.16855	0.0566527	4.1818	0.017216	4.71064	0.00220499	2.16855	0.460353	17.32	0.81	14.17	0.31	480	92.4	14.04	0.31	20	14.0131	0.599334	14.0131	0.599334
				TLT13_03a		bd	5511.06	320.236	546.373	431023	17962.5	0.298974	1.40604	177.224	592.773	432.167	1.83944	0.0556466	2.84724	0.0177457	3.38974	0.00231392	1.83944	0.542649	17.82	0.6	14.81	0.27	445	63.5	14.64	0.27	19	14.7239	0.534747	14.7239	0.534747
				TLT13_03b		bd	34470.3	1634.35	5751.72	5560168	116532	0.59449	9.22774	2286.17	3845.6	446.919	1.39864	0.0464342	1.28266	0.0143191	1.89773	0.00223754	1.39864	0.737004	14.42	0.27	14.17	0.2	56.4	30.6	14.16	0.2	1.8	14.406	0.402457	14.406	0.402457
				TLT13_04		bd	11830.4	583.313	2332.44	2195692	40046.9	0.683129	3.25097	902.803	1321.57	454.939	1.57828	0.049928	2.24657	0.0151251	2.74554	0.0021981	1.57828	0.57485	15.22	0.42	14.17	0.22	184.7	52.7	14.14	0.22	7.2	14.0897	0.442229	14.0897	0.442229
				TLT13_05		bd	14779.1	786.8	972.314	684066	50018.5	0.170399	3.64605	281.267	1650.64	451.631	1.47344	0.0529307	3.01698	0.0161521	3.35755	0.00221419	1.47344	0.438842	16.32	0.54	14.17	0.21	346.1	68.3	14.11	0.21	14	14.1387	0.41276	14.1387	0.41276
				TLT13_06		bd	52376.7	2543.48	942.748	930245	184280	0.0628956	12.3157	382.489	6081.33	460.969	1.36283	0.0473837	1.24189	0.0141665	1.84379	0.00216934	1.36283	0.739142	14.32	0.26	14.17	0.19	39.7	29.7	14.17	0.19	1.1	13.9505	0.379306	13.9505	0.379306
				TLT13_07b		bd	15878.4	752.859	612.446	529518	46836.8	0.140862	3.80158	217.722	1545.64	395.262	2.24707	0.0466324	1.78938	0.0162595	2.87249	0.00252997	2.24707	0.782272	16.42	0.47	16.1	0.36	63.8	42.8	16.09	0.36	2	16.283	0.730564	16.283	0.730564
				TLT13_08		bd	14052.9	642.23	1231.22	1171512	46608.8	0.31317	3.51116	481.691	1538.11	442.383	1.46754	0.0446829	2.13795	0.0139203	2.59316	0.00226049	1.46754	0.565927	14.02	0.36	14.81	0.22	0.00017	51.0025	14.79	0.22	-5.5	14.5858	0.428499	14.5858	0.428499
				TLT13_09		bd	19170.6	909.592	1143.67	1226698	66850.9	0.228629	4.67906	504.382	2206.11	462.571	1.45717	0.0472999	2.15655	0.0140925	2.6027	0.00216183	1.45717	0.559868	14.22	0.37	14.17	0.21	22.8	51.7	14.17	0.21	0.36	13.9037	0.404245	13.9037	0.404245
				TLT13_10		bd	15835.6	754.072	1512.2	1335894	52829	0.315065	3.99079	549.28	1743.39	435.701	1.59079	0.0478268	2.04871	0.0151283	2.5938	0.00229515	1.59079	0.613304	15.22	0.39	14.81	0.24	80.2	48.8	14.81	0.24	2.7	14.7506	0.467863	14.7506	0.467863
				TLT13_11		bd	20989	977.768	2919.73	2678632	70161.8	0.475678	5.48654	1101.37	2315.38	440.525	1.47007	0.0462693	1.75112	0.0144753	2.28637	0.00227002	1.47007	0.642969	14.62	0.33	14.81	0.22	0.00017	44.0058	14.81	0.22	-1.3	14.618	0.429319	14.618	0.429319
				TLT13_12		bd	2505.15	122.989	90.8089	113840	8584.01	0.165237	0.599426	46.8077	283.277	455.296	2.1845	0.0486651	6.05745	0.0147309	6.43932	0.00219637	2.1845	0.339245	14.82	0.95	14.17	0.31	122	143	14.16	0.31	4.5	14.1013	0.613577	14.1013	0.613577
				TLT13_14		bd	19380	1017.91	1094.64	832246	65905	0.157338	4.73829	342.195	2174.9	423.11	2.44016	0.0607266	5.63567	0.0197802	6.14127	0.00236345	2.44016	0.397338	19.91	1.21	15.45	0.38	598	122	15.31	0.37	25	14.9411	0.715683	14.9411	0.715683
				TLT13_15		bd	4247.87	179.339	435.461	487692	14284.8	0.425375	1.07204	200.524	471.406	444.133	1.95079	0.041538	5.16309	0.0128896	5.51934	0.00225158	1.95079	0.353446	13.01	0.71	14.81	0.29	0.00017	114.926	14.76	0.29	-13	14.586	0.571933	14.586	0.571933
				TLT13_16		bd	6742.04	312.277	761.833	677234	23397.8	0.360632	1.72317	278.458	772.141	454.023	1.87822	0.0452089	2.76057	0.0137231	3.33893	0.00220253	1.87822	0.562521	13.82	0.46	14.17	0.27	0.00017	68.3082	14.16	0.27	-2.5	14.2027	0.533657	14.2027	0.533657
				TLT13_07a	inherited	bd	152436	8114.08	38424.5	1803509	31437.5	0.714776	43.8663	741.549	1037.46	27.109	1.38899	0.0523195	0.887108	0.265984	1.64811	0.0368881	1.38899	0.84278	239.49	3.52	233.59	3.19	297.8	20.5	234.69	3.19	2.8	233.089	6.34456	234.69	3.19
				TLT13_13	inherited	bd	82731.8	6319.21	8032.58	101432	3341.77	0.378181	21.4033	41.7058	110.28	5.35943	1.55665	0.0750129	0.870828	1.92896	1.78368	0.186587	1.55665	0.87272	1091.2	11.9	1102.9	15.8	1067.8	17.8	1087.2	11.6	-1.6	1104.49	31.5751	1087.2	11.6
Tinos	Monzogranite pluton	Centre Pluton	TLTN36	TLTN36_15		bd	10545.8	530.058	2866.28	1922606	38163.1	0.627693	3.07372	790.518	1259.4	473.121	2.03752	0.0485717	2.32248	0.0141487	3.08956	0.00211362	2.03752	0.659485	14.22	0.44	13.52	0.28	133.2	54.6	13.5	0.28	5	13.572	0.550877	13.572	0.550877
				TLTN36_27		bd	29719.9	1439.59	1740.39	1339238	108630	0.153606	7.25318	550.655	3584.85	462.687	1.73691	0.0502643	2.29567	0.014972	2.87871	0.00216129	1.73691	0.603363	15.12	0.43	14.17	0.25	169.2	53.9	14.14	0.25	6.5	13.848	0.478129	13.848	0.478129
				TLTN36_12		bd	7748.45	431.916	522.508	349672	26088	0.167001	1.91866	143.775	860.919	451.079	2.3542	0.0692562	6.85756	0.0211598	7.2504	0.00221691	2.3542	0.3247	21.3	1.53	14.17	0.33	925	141	13.99	0.33	41	13.8614	0.635391	13.8614	0.635391
				TLTN36_10		bd	5088.82	272.826	462.506	321612	17485.9	0.229164	1.28401	132.237	577.043	458.76	2.27267	0.0524857	2.78461	0.0157675	3.59431	0.00217979	2.27267	0.632295	15.92	0.57	14.17	0.32	289.3	63.7	14.06	0.32	12	13.9271	0.62741	13.9271	0.62741
				TLTN36_21		bd	1786.94	96.1145	151.444	106823	6197.35	0.214764	0.44853	43.9225	204.516	457.418	2.74203	0.0537857	4.67948	0.0162054	5.42368	0.00218618	2.74203	0.505567	16.32	0.88	14.17	0.39	346	105	14.08	0.39	14	13.9447	0.756749	13.9447	0.756749
				TLTN36_22		bd	18423.2	924.534	1220.77	826382	65288.1	0.157706	4.53458	339.784	2154.54	459.427	1.77629	0.0486123	2.30499	0.0145826	2.91001	0.00217662	1.77629	0.610405	14.72	0.43	14.17	0.25	105.7	54.5	14.16	0.25	3.8	13.9755	0.494495	13.9755	0.494495
				TLTN36_20		bd	16282.1	946.151	1011.47	577445	55157.7	0.130438	4.02116	237.428	1820.23	446.522	1.98355	0.0566305	3.12613	0.0174789	3.70232	0.00223953	1.98355	0.535759	17.62	0.65	14.17	0.28	518.1	68.4	13.94	0.28	22	14.2329	0.556752	14.2329	0.556752
				TLTN36_09		bd	8979.1	458.769	1197.35	921375	30737.8	0.373477	2.34466	378.842	1014.36	450.418	1.98619	0.0493911	2.25612	0.0151126	3.00583	0.00222016	1.98619	0.660779	15.22	0.45	14.17	0.28	184.7	52.7	14.12	0.28	7.2	14.2407	0.562858	14.2407	0.562858
				TLTN36_29		bd	28693.7	1411.42	1931.51	1288885	98644.1	0.162796	7.06287	529.951	3255.31	447.872	2.03157	0.0492208	2.16323	0.0151461	2.96763	0.00223278	2.03157	0.684576	15.22	0.45	14.17	0.29	184.7	50.8	14.12	0.29	7.2	14.3247	0.579234	14.3247	0.579234
				TLTN36_08		bd	20902.4	997.14	1031.61	760867	70136.5	0.135165	5.05545	312.846	2314.54	447.159	1.92675	0.0468161	2.0415	0.0144291	2.80715	0.00223634	1.92675	0.686372	14.52	0.41	14.17	0.27	73	48.4	14.16	0.27	2.5	14.3913	0.553582	14.3913	0.553582
				TLTN36_11		bd	9891.7	473.121	1367.08	964383	33558.3	0.358055	2.58644	396.526	1107.44	447.09	2.61789	0.046829	2.54655	0.0144353	3.65216	0.00223668	2.61789	0.716805	14.52	0.53	14.17	0.37	73	60.3	14.16	0.37	2.5	14.3933	0.752235	14.3933	0.752235
				TLTN36_13		bd	16419.4	989.933	2102.58	1129479	54408.2	0.258651	4.30164	464.408	1795.5	438.23	2.14117	0.0600412	2.55197	0.0188822	3.33124	0.00228191	2.14117	0.642754	19.01	0.63	14.81	0.32	589	55.5	14.33	0.31	25	14.4387	0.607009	14.4387	0.607009
				TLTN36_23		bd	21836.3	1082.32	3380.19	2733407	76025.8	0.447965	5.79789	1123.9	2508.89	442.496	1.92533	0.0490157	1.7508	0.0152662	2.60235	0.00225991	1.92533	0.739845	15.42	0.4	14.81	0.29	111.4	41.3	14.79	0.29	4.1	14.5024	0.555892	14.5024	0.555892
				TLTN36_05		bd	2139.36	116.684	219.52	131645	6905.03	0.237542	0.545768	54.1286	227.87	438.269	2.67029	0.0546863	5.33282	0.0171966	5.96401	0.0022817	2.67029	0.447734	17.32	1.02	14.81	0.4	381	120	14.73	0.39	16	14.5368	0.767405	14.5368	0.767405
				TLTN36_24		bd	8639.17	425.81	507.846	392680	29242.1	0.167313	2.11045	161.458	965.005	440.396	2.12317	0.0475376	2.8265	0.0148765	3.5351	0.00227069	2.12317	0.600596	15.02	0.53	14.81	0.31	48.5	67.7	14.81	0.31	1.4	14.5988	0.618237	14.5988	0.618237
				TLTN36_25		bd	4544.59	219.393	740.547	552702	15275.5	0.450814	1.21354	227.255	504.098	439.794	2.74617	0.0476904	3.23097	0.0149447	4.24036	0.00227379	2.74617	0.647628	15.02	0.63	14.81	0.41	48.5	77	14.81	0.41	1.4	14.6159	0.800418	14.6159	0.800418
				TLTN36_02		bd	10371.3	537.937	1105.51	687786	33692.1	0.254347	2.6488	282.797	1111.86	432.494	2.03343	0.0504075	3.24111	0.0160628	3.82617	0.00231217	2.03343	0.531452	16.22	0.62	14.81	0.3	230.3	75	14.77	0.3	9.1	14.8113	0.598555	14.8113	0.598555
				TLTN36_26		bd	6325	311.996	734.199	540356	21361.9	0.315167	1.62507	222.178	704.954	433.328	2.17397	0.0470005	2.95659	0.0149483	3.66982	0.00230772	2.17397	0.592392	15.02	0.55	14.81	0.32	48.5	70.8	14.81	0.32	1.4	14.8468	0.644213	14.8468	0.644213
				TLTN36_14	high cm-pb	bd	7829.76	1119.87	2173.1	307452	21625.1	0.177141	2.45214	126.415	713.639	391.739	3.67295	0.115637	12.7945	0.0406825	13.3112	0.00255272	3.67295	0.275929	40.51	5.29	16.74	0.61	1857	231	16.26	0.6	88	14.9958	1.05849	14.9958	1.05849
				TLTN36_19	rej from age cal	bd	9231.15	477.641	681.065	447432	29664.9	0.187925	2.29057	183.971	978.958	425.025	2.13286	0.0511058	3.03844	0.0165715	3.71231	0.0023528	2.13286	0.574538	16.72	0.62	15.45	0.33	202.6	70.8	15.42	0.33	7.9	15.058	0.637706	15.058	0.637706
				TLTN36_18	rej from age cal	bd	2963.66	148.852	200.535	146296	9522.01	0.191428	0.730401	60.1526	314.231	425.23	2.57187	0.0503905	4.44187	0.0163317	5.13271	0.00235167	2.57187	0.501074	16.42	0.84	15.45	0.4	160	104	15.44	0.4	6.1	15.0645	0.769987	15.0645	0.769987
				TLTN36_01	rej from age cal	bd	15266.1	788.56	844.972	509637	48160.6	0.131847	3.72574	209.547	1589.32	421.748	2.34506	0.0489006	2.22919	0.0159796	3.23552	0.00237108	2.34506	0.724786	16.12	0.52	15.45	0.36	116.5	53.1	15.43	0.36	4.2	15.2175	0.710529	15.2175	0.710529
				TLTN36_03	rej from age cal	bd	16200.5	1131.49	2639.04	1140341	50920.8	0.279023	4.40285	468.874	1680.41	406.708	2.20707	0.0705399	4.07009	0.0239033	4.62999	0.00245877	2.20707	0.47669	23.98	1.1	16.1	0.36	908.7	83.7	15.59	0.35	40	15.3468	0.65699	15.3468	0.65699
				TLTN36_28	rej from age cal	bd	7447.5	351.188	369.629	296143	23254.5	0.15867	1.8008	121.765	767.409	417.985	2.32994	0.0478157	2.77306	0.0157658	3.62195	0.00239243	2.32994	0.643285	15.92	0.57	15.45	0.36	86.7	66	15.45	0.36	3	15.3755	0.714256	15.3755	0.714256
				TLTN36_04	rej from age cal	bd	11157.9	555.199	408.041	222170	34087.8	0.0812058	2.67226	91.3496	1124.91	413.954	2.12881	0.0516918	3.07134	0.0172098	3.73697	0.00241573	2.12881	0.569661	17.32	0.64	15.45	0.33	284.4	70.3	15.37	0.33	11	15.4489	0.652521	15.4489	0.652521
				TLTN36_17	rej from age cal	bd	26159.3	1291.9	884.188	543042	81133.1	0.0833942	6.24689	223.282	2677.43	406.43	2.19226	0.0474444	1.9982	0.0160881	2.96628	0.00246045	2.19226	0.739062	16.22	0.48	16.1	0.35	34.3	47.9	16.1	0.35	0.76	15.8197	0.691773	15.8197	0.691773
				TLTN36_06	inherited	bd	15353.7	905.009	2780.18	104839	3045.43	0.42892	4.19735	43.1068	100.501	26.0242	2.09146	0.0578824	2.42347	0.306531	3.20116	0.0384258	2.09146	0.653345	271.46	7.62	242.91	4.98	525.6	53.4	242.44	5.03	12	241.019	9.80357	242.44	5.03
Tinos	Monzogranite pluton	S Margin Pluton	TLTN34	TLTN34_01		bd	26511.7	1360.37	1872.57	1433024	92543.2	0.192934	6.55757	589.217	3053.97	449.116	1.89293	0.0511126	1.73329	0.0156847	2.56661	0.0022266	1.89293	0.737522	15.82	0.4	14.17	0.27	274.7	39.7	13.98	0.27	11	14.2508	0.535638	14.2508	0.535638
				TLTN34_02		bd	17875.7	882.197	993.775	831012	60337.2	0.171602	4.35449	341.687	1991.16	443.618	1.8978	0.0491087	2.16188	0.0152565	2.87669	0.00225419	1.8978	0.659716	15.42	0.44	14.81	0.28	111.4	51.1	14.79	0.28	4.1	14.464	0.546432	14.464	0.546432
				TLTN34_03		bd	4631.35	259.152	702.858	440176	15227.5	0.360162	1.23312	180.987	502.517	416.66	2.47299	0.054824	3.44958	0.018134	4.24444	0.00240004	2.47299	0.582642	18.21	0.77	15.45	0.38	399.9	77.4	15.28	0.38	17	15.2875	0.747156	15.2875	0.747156
				TLTN34_04		bd	10495.3	528.447	773.212	614601	34634.3	0.221099	2.60079	252.705	1142.95	432.031	2.10468	0.0494031	2.24038	0.0157596	3.07392	0.00231465	2.10468	0.68469	15.92	0.48	14.81	0.31	186.7	52.4	14.76	0.31	7.3	14.8461	0.621758	14.8461	0.621758
				TLTN34_05	rej from age cal	bd	2170.08	136.408	155.542	117133	7401.12	0.197188	0.542784	48.1615	244.241	447.828	2.70913	0.0612401	4.06671	0.0188465	4.88646	0.002233	2.70913	0.554415	18.91	0.92	14.17	0.38	673.3	87.4	13.8	0.38	29	14.1077	0.749408	14.1077	0.749408
				TLTN34_06	rej from age cal	bd	16445.1	818.524	1195.75	792264	51479.9	0.191749	4.06959	325.755	1698.86	405.534	1.95928	0.0487959	2.22211	0.016583	2.96252	0.00246589	1.95928	0.661356	16.72	0.49	16.1	0.32	107	52.6	16.08	0.32	3.8	15.8275	0.617509	15.8275	0.617509
				TLTN34_07		bd	21545.5	1550.06	6065.06	3654734	70146.5	0.649158	6.4288	1502.72	2314.87	426.916	1.57499	0.0710791	2.24618	0.0229459	2.74334	0.00234238	1.57499	0.574112	22.99	0.62	14.81	0.23	991.9	45.8	13.96	0.23	44	14.6106	0.445771	14.6106	0.445771
				TLTN34_08		bd	23763.1	1181.99	1291.51	978505	78099.9	0.156104	5.78419	402.332	2577.34	426.567	1.78141	0.0490873	1.9831	0.0158594	2.66573	0.0023443	1.78141	0.668263	16.02	0.42	14.81	0.26	201.4	46.1	14.74	0.26	7.9	15.0421	0.533418	15.0421	0.533418
				TLTN34_09		bd	22250.5	1127.83	1443.61	1003795	74035	0.168931	5.47231	412.73	2443.19	431.469	1.92255	0.0492075	2.15867	0.0157177	2.89069	0.00231766	1.92255	0.665085	15.82	0.45	14.81	0.28	171.9	50.1	14.76	0.28	6.6	14.8691	0.568977	14.8691	0.568977
				TLTN34_10		bd	4998.96	288.716	723.766	455731	15918.9	0.356695	1.3253	187.383	525.331	410.382	2.01306	0.0562865	3.09479	0.0189026	3.6919	0.00243676	2.01306	0.545265	19.01	0.7	15.45	0.31	496	68	15.22	0.31	21	15.4922	0.615239	15.4922	0.615239
				TLTN34_11		bd	23739.5	1213.14	1485.05	1062875	79536.9	0.1665	5.8285	437.022	2624.76	438.426	1.69866	0.0506998	1.72744	0.0159373	2.4227	0.00228089	1.69866	0.701142	16.02	0.38	14.81	0.25	201.4	40.2	14.74	0.25	7.9	14.6057	0.492885	14.6057	0.492885
				TLTN34_13		bd	33335.9	1723.29	3754.88	3040080	113636	0.333325	8.55704	1249.99	3750.06	435.925	1.45465	0.0499268	1.48592	0.0157844	2.07942	0.00229397	1.45465	0.699548	15.92	0.33	14.81	0.21	186.7	34.6	14.74	0.21	7.3	14.7038	0.425338	14.7038	0.425338
				TLTN34_14		bd	24381.8	1218.57	1399.25	1025741	82154.4	0.155563	5.95238	421.754	2711.14	429.829	1.57394	0.0491862	1.73525	0.0157708	2.34273	0.00232651	1.57394	0.671841	15.92	0.37	14.81	0.23	186.7	40.5	14.76	0.23	7.3	14.9262	0.46761	14.9262	0.46761
				TLTN34_15		bd	23975.3	1206.77	2203.84	1658831	77886.7	0.265362	6.03756	682.062	2570.3	424.089	1.64298	0.0500787	1.86179	0.0162743	2.48307	0.00235799	1.64298	0.661674	16.42	0.4	15.45	0.25	160.1	43.6	15.42	0.25	6.1	15.1109	0.4936	15.1109	0.4936
				TLTN34_16		bd	7549.89	410.557	830.136	653189	24532.4	0.331741	1.93799	268.572	809.582	425.628	1.97755	0.0569648	3.02616	0.0184452	3.61502	0.00234947	1.97755	0.547038	18.51	0.66	14.81	0.29	530.6	66.3	14.56	0.29	22	14.9247	0.581775	14.9247	0.581775
				TLTN34_17		bd	10495.1	561.537	916.499	704902	33376.1	0.263144	2.63962	289.835	1101.43	413.288	1.72107	0.0530847	2.1156	0.017702	2.72724	0.00241962	1.72107	0.631068	17.82	0.48	15.45	0.27	349.6	48	15.28	0.26	14	15.4464	0.52653	15.4464	0.52653
				TLTN34_18		bd	13595.3	725.76	791.951	445453	44613.4	0.124405	3.33184	183.157	1472.27	428.833	1.62936	0.0526716	2.21786	0.0169276	2.75204	0.00233191	1.62936	0.592055	17.02	0.46	14.81	0.24	341.2	50.3	14.68	0.24	14	14.8947	0.480941	14.8947	0.480941
				TLTN34_19		bd	7001.67	480.584	726.408	455479	23030.4	0.246416	1.8097	187.279	760.014	424.614	1.92418	0.0645672	3.16619	0.0209568	3.70503	0.00235508	1.92418	0.519342	21.1	0.77	15.45	0.3	723.7	67.3	15.05	0.29	31	14.8146	0.556722	14.8146	0.556722
				TLTN34_20		bd	165580	8253.65	11104.3	9103157	557067	0.203603	40.7718	3742.95	18383.5	431.229	1.37241	0.0483293	0.849803	0.0154457	1.61421	0.00231895	1.37241	0.850206	15.52	0.25	14.81	0.2	126.7	20.1	14.74	0.2	4.7	14.894	0.407298	14.894	0.407298
				TLTN34_21		bd	17472.1	865.433	3149.46	2906826	59341	0.61033	4.73707	1195.2	1958.28	441.805	1.41975	0.0489349	1.7887	0.0152649	2.28367	0.00226344	1.41975	0.621699	15.42	0.35	14.81	0.21	111.4	42.3	14.8	0.21	4.1	14.5266	0.410649	14.5266	0.410649
				TLTN34_22		bd	9959	521.287	1508.98	1155439	34465.1	0.417704	2.64318	475.082	1137.37	439.276	1.93502	0.0515991	2.69932	0.0161887	3.32124	0.00227647	1.93502	0.58262	16.32	0.54	14.81	0.29	244.6	62.3	14.75	0.29	9.8	14.5608	0.559118	14.5608	0.559118
				TLTN34_23		bd	4763.99	243.956	518.94	444299	16006.8	0.345838	1.21847	182.682	528.231	434.372	2.09531	0.051193	3.47814	0.0162426	4.06052	0.00230218	2.09531	0.516021	16.32	0.66	14.81	0.31	244.6	79.9	14.76	0.31	9.8	14.7326	0.612895	14.7326	0.612895
				TLTN34_24		bd	2630.11	147.292	309.021	248284	8652.32	0.357533	0.680441	102.087	285.531	435.226	2.11583	0.054442	4.75627	0.0172395	5.20565	0.00229766	2.11583	0.406448	17.32	0.89	14.81	0.31	381	107	14.75	0.31	16	14.643	0.612722	14.643	0.612722
				TLTN34_25		bd	7124.49	355.286	948.217	761920	23730.5	0.400039	1.85805	313.279	783.119	429.954	1.86882	0.049633	2.45255	0.0159094	3.08342	0.00232583	1.86882	0.606085	16.02	0.49	14.81	0.28	201.4	56.7	14.76	0.28	7.9	14.9134	0.554425	14.9134	0.554425
				TLTN34_26		bd	23449.1	1156.94	2230.59	2014022	78952.9	0.317831	5.91646	828.106	2605.49	433.026	1.67636	0.0489089	1.46484	0.0155661	2.2262	0.00230933	1.67636	0.753015	15.72	0.35	14.81	0.25	157	34.6	14.76	0.25	6	14.8213	0.494712	14.8213	0.494712
				TLTN34_27		bd	21758.6	1127.01	2670.84	2225959	74108.4	0.37424	5.63422	915.248	2445.62	431.99	1.46178	0.049776	1.48017	0.0158801	2.08031	0.00231487	1.46178	0.702673	16.02	0.33	14.81	0.22	201.4	34.6	14.74	0.22	7.9	14.8405	0.431474	14.8405	0.431474
				TLTN34_28		bd	3400.67	183.765	143.935	95750.8	11114.6	0.107337	0.821965	39.3699	366.787	417.317	2.18451	0.053034	3.60509	0.0175143	4.2153	0.00239626	2.18451	0.518234	17.62	0.74	15.45	0.34	323.8	81.9	15.37	0.34	13	15.2983	0.661975	15.2983	0.661975
				TLTN34_30		bd	27192.3	1314.26	750.937	555553	88835.7	0.0779182	6.45017	228.427	2931.63	418.874	1.73023	0.0495846	1.53992	0.0163143	2.31626	0.00238735	1.73023	0.746995	16.42	0.38	15.45	0.27	160.1	36	15.38	0.27	6.1	15.3085	0.526928	15.3085	0.526928
				TLTN34_31		bd	18950	917.096	1911.87	1697461	64450.1	0.328153	4.80144	697.945	2126.89	442.458	1.53939	0.0501091	1.919	0.0156081	2.46013	0.0022601	1.53939	0.625733	15.72	0.38	14.81	0.23	157	44.8	14.78	0.23	6	14.4835	0.443275	14.4835	0.443275
				TLTN34_32		bd	16973.8	815.908	822.519	684657	57070	0.149474	4.10328	281.511	1883.34	435.567	1.61115	0.0478442	1.89864	0.0151384	2.49011	0.00229586	1.61115	0.647021	15.22	0.38	14.81	0.24	80.2	45	14.8	0.24	2.7	14.7548	0.473975	14.7548	0.473975
				TLTN34_33		bd	5500.39	289.745	694.837	555117	17995.8	0.384339	1.42969	228.247	593.871	425.945	1.85219	0.0523118	2.79361	0.0169259	3.35184	0.00234772	1.85219	0.552587	17.02	0.57	14.81	0.27	341.2	63.4	14.71	0.27	14	15.0025	0.550917	15.0025	0.550917
				TLTN34_34		bd	4257.03	217.503	516.725	467536	14047.9	0.414672	1.10038	192.237	463.588	421.017	2.1336	0.048882	3.64319	0.0160013	4.22198	0.0023752	2.1336	0.505355	16.12	0.67	15.45	0.33	116.5	85.6	15.44	0.33	4.2	15.2442	0.647621	15.2442	0.647621
				TLTN34_12	high cm-Pb	bd	5211.07	991.642	2257.73	259166	12800.8	0.252257	1.86521	106.562	422.433	308.568	6.05379	0.152582	13.1219	0.0681488	14.4511	0.00324078	6.05379	0.418916	66.89	9.35	20.6	1.24	2395	223	18.66	1.18	120	18.0603	1.99405	18.0603	1.99405
				TLTN34_29	high cm-Pb	bd	44875.7	4504.55	6995.92	1520237	139857	0.135434	12.4288	625.076	4615.36	282.819	6.07611	0.274748	11.4069	0.133885	12.9242	0.00353583	6.07611	0.470133	127.6	15.5	22.52	1.37	3349	178	18.83	1.25	170	16.1882	1.75689	16.1882	1.75689
Tinos	Grt-Ms Leucogranite	Livada Bay	TLTN13	TL13_02	rej from age cal	402.049	71599.4	9309.75	19722.7	6625422	221636	195.932	1070.77	2.21621e+06	11311.1	373.74	3.39983	0.135954	10.887	0.0501335	11.4055	0.00267566	3.39983	0.298088	49.64	5.53	17.38	0.59	2159	190	16.68	0.58	100	15.275	0.993844	15.275	0.993844
				TL13_03		bd	108599	7679.41	13090.6	7493274	371143	132.331	1376.54	2.5065e+06	18941.2	415.03	1.34307	0.0748477	6.53569	0.0248545	6.67226	0.00240946	1.34307	0.201291	24.97	1.65	15.45	0.21	1075	131	15.36	0.21	48	14.9547	0.393115	14.9547	0.393115
				TL13_04		bd	131957	7560.57	11055	10100080	471338	140.451	1602.15	3.37848e+06	24054.6	423.128	1.35388	0.0573087	1.94822	0.0186661	2.37245	0.00236335	1.35388	0.570665	18.81	0.44	15.45	0.21	472.5	43.1	15.22	0.21	20	15.0061	0.400291	15.0061	0.400291
				TL13_05		365.73	115720	10454.1	23758.2	11426230	391140	191.47	1595.34	3.82208e+06	19961.7	413.199	1.59419	0.0892261	4.90927	0.0297603	5.16162	0.00242014	1.59419	0.308855	29.82	1.52	15.45	0.25	1426.7	93.7	15.08	0.24	66	14.7377	0.45075	14.7377	0.45075
				TL13_09	rej from age cal	bd	64626.7	5664.36	9113.81	2740480	207583	86.5298	844.901	916692	10594	396.384	1.74011	0.0859419	4.60927	0.029881	4.9268	0.00252281	1.74011	0.353192	29.91	1.45	16.1	0.28	1354.8	89.1	15.63	0.28	62	15.4299	0.51441	15.4299	0.51441
				TL13_10		473.072	155238	13614.2	23817.7	9946093	523834	124.448	2050.09	3.32697e+06	26733.8	408.218	1.41834	0.0848632	2.8981	0.0286506	3.22655	0.00244967	1.41834	0.439585	28.73	0.92	15.45	0.22	1354.5	56	14.69	0.21	62	15.0045	0.406611	15.0045	0.406611
				TL13_11		339.893	149764	11328.9	17548.4	9107558	519389	114.932	1900.81	3.04648e+06	26506.9	418.345	1.48958	0.0747397	2.96387	0.024622	3.31713	0.00239037	1.48958	0.449056	24.68	0.81	15.45	0.23	1050.7	59.8	14.92	0.23	47	14.8385	0.426838	14.8385	0.426838
				TL13_12		363.195	169268	13313.9	25797.9	12028060	596628	132.136	2217.25	4.02339e+06	30448.8	427.632	1.64832	0.0804681	5.70381	0.0259334	5.9372	0.00233846	1.64832	0.277625	25.96	1.52	14.81	0.24	1238	112	14.58	0.24	56	14.4074	0.459425	14.4074	0.459425
				TL13_16		325.69	129339	10492.9	16135.4	7417416	440378	110.397	1659.55	2.48113e+06	22474.6	413.879	1.34731	0.0787376	5.43268	0.026219	5.59725	0.00241617	1.34731	0.240709	26.26	1.45	15.45	0.21	1177	108	15.29	0.21	53	14.9198	0.390772	14.9198	0.390772
				TLTN13_01		bd	347419	20489.5	29385.9	24903250	1289562	0.198519	56.1964	4980.71	25089.4	427.179	1.19438	0.0581827	1.78549	0.0187711	2.14814	0.00234094	1.19438	0.556004	18.91	0.4	14.81	0.18	577.5	38.8	14.49	0.17	25	14.8473	0.349026	14.8473	0.349026
				TLTN13_05	rej from age cal	423.492	451347	26378.5	35654.6	24046150	1520762	0.162544	72.6164	4809.29	29587.5	396.142	1.14563	0.0574679	1.3473	0.0199931	1.76852	0.00252435	1.14563	0.647788	20.11	0.35	16.1	0.19	530.6	29.6	15.64	0.18	22	16.0243	0.361585	16.0243	0.361585
				TLTN13_07	rej from age cal	575.695	205678	18852.8	37608.2	22409320	739902	198.511	2789.27	7.49593e+06	37760.7	435.698	1.32955	0.08721	7.54447	0.0275858	7.66072	0.00229517	1.32955	0.173554	27.64	2.09	14.81	0.2	1361	145	14.72	0.2	62	14.0149	0.369525	14.0149	0.369525
				TLTN13_14		bd	137391	8946.24	12066	8295601	498959	108.972	1685.48	2.77488e+06	25464.3	440.669	1.43365	0.0636896	2.09289	0.0199188	2.53684	0.00226928	1.43365	0.565132	20.01	0.5	14.81	0.21	699.8	44.5	14.34	0.21	30	14.2914	0.400532	14.2914	0.400532
				TL13_01	high cm-Pb	2075.27	68265.6	33606.7	82089.6	3535187	105212	220.232	1957.43	1.18252e+06	5369.44	183.84	2.43682	0.483192	1.58948	0.362231	2.90939	0.00543952	2.43682	0.837571	313.86	7.86	34.72	0.85	4200.7	23.7	11.79	0.49	210	15.6697	0.438219	15.6697	0.438219
				TL13_06	high cm-Pb	1065.77	140452	23817.9	51714.8	9055346	431494	137.55	2298.17	3.02902e+06	22021.2	385.071	2.09513	0.157738	5.84924	0.0564547	6.21314	0.00259692	2.09513	0.33721	55.81	3.37	16.74	0.35	2430.1	99.1	15.72	0.34	120	14.3653	0.56811	14.3653	0.56811
				TL13_08	high cm-Pb	1083.08	166414	25107.2	56350.9	17413350	524904	217.437	2637.46	5.82477e+06	26788.4	388.314	2.13357	0.145233	5.9045	0.0515451	6.27815	0.00257524	2.13357	0.339841	50.99	3.12	16.74	0.36	2272	102	15.8	0.35	110	14.5075	0.581796	14.5075	0.581796
				TLTN13_02	high cm-Pb	1407.3	3827939	197818	2756426	1565398000	12141620	1.32537	959.324	313083	236224	373.299	0.961175	0.0516031	2.37906	0.0190513	2.56588	0.00267882	0.961175	0.374598	19.21	0.49	17.38	0.17	254.6	54.9	17.36	0.17	10	17.1318	0.326757	17.1318	0.326757
				TLTN13_03	high cm-Pb	2410.62	3954873	210951	2911982	bd	12667960	bd	1001.14	bd	246464	375.229	1.0689	0.0541892	2.55533	0.0199032	2.76988	0.00266504	1.0689	0.385902	20.01	0.55	17.38	0.19	348.2	57.7	17.33	0.19	14	16.9877	0.359192	16.9877	0.359192
				TLTN13_06	high cm-Pb	2582.83	206890	48045	115700	46804870	627507	0.766762	52.4254	9361.09	12208.6	359.547	2.02254	0.224501	4.66746	0.0860537	5.08683	0.00278128	2.02254	0.397604	83.86	4.1	18.02	0.36	3002.6	75.1	16.12	0.34	150	13.8726	0.523009	13.8726	0.523009
Delos	Leucogranite	NW Delos	17TL95	95_01a		bd	3411.48	240.038	443.618	431035	1669372	37.6183	1.267	140.037	3.72258	444.917	1.75746	0.0702432	3.20804	0.0217586	3.65789	0.00224761	1.75746	0.480457	21.9	0.79	14.17	0.25	982.2	65.4	13.66	0.24	44	14.0351	0.478627	14.0351	0.478627
				95_01b		bd	3166.09	181.743	700.106	1067635	1605799	96.8662	1.2524	346.86	3.58082	459.337	1.56048	0.0580214	3.78386	0.0174086	4.09301	0.00217705	1.56048	0.381254	17.52	0.71	14.17	0.22	505.5	83.3	14.08	0.22	21	13.8115	0.424476	13.8115	0.424476
				95_01c		bd	2255.82	134.335	252.875	352357	1157563	44.3485	0.817733	114.476	2.58128	467.572	1.83746	0.0609211	4.99999	0.0179567	5.32693	0.00213871	1.83746	0.344939	18.11	0.96	13.52	0.25	680	107	13.41	0.25	29	13.5179	0.487697	13.5179	0.487697
				95_02		bd	6133.64	353.596	751.033	1149171	3584045	46.7145	2.23946	373.35	7.99216	527.08	1.40693	0.0561597	4.12104	0.0146843	4.35459	0.00189725	1.40693	0.323092	14.82	0.64	12.24	0.17	456.8	91.5	12.2	0.17	19	12.0662	0.335189	12.0662	0.335189
				95_03a		bd	9339.49	641.194	1003.82	926260	5334297	25.2986	3.39851	300.929	11.8951	521.168	1.43582	0.0678446	1.79793	0.0179409	2.30089	0.00191877	1.43582	0.624026	18.01	0.41	12.24	0.18	878.5	37.4	11.5	0.17	39	12.0204	0.335648	12.0204	0.335648
				95_03b		bd	2682.97	155.698	836.731	1466306	1567947	136.249	1.13714	476.382	3.49641	527.688	1.81456	0.0616668	4.36964	0.0161057	4.73143	0.00189506	1.81456	0.383513	16.22	0.76	12.24	0.22	655.3	93.9	12.12	0.22	28	11.9673	0.425929	11.9673	0.425929
				95_04		bd	6733.29	351.004	437.137	668056	3407451	28.5643	2.32707	217.042	7.59837	458.463	1.43629	0.051952	2.71989	0.0156172	3.07583	0.0021812	1.43629	0.466961	15.72	0.48	14.17	0.2	260.1	62.5	14.13	0.2	10	13.9455	0.397333	13.9455	0.397333
				95_05		bd	6741.7	349.851	906.454	1483216	3912448	55.2327	2.47452	481.876	8.72448	523.279	1.50722	0.052027	2.24821	0.0137026	2.70668	0.00191103	1.50722	0.55685	13.82	0.37	12.24	0.18	298.4	51.3	12.16	0.18	12	12.2181	0.365294	12.2181	0.365294
Tinos	Cross cutting leucogranite	Livada Bay	17TL100	100_01		bd	6763.86	412.856	547.325	536498	3302231	23.6702	2.38975	174.301	7.36374	448.852	1.72929	0.0598099	3.12406	0.0183644	3.57074	0.00222791	1.72929	0.484294	18.51	0.66	14.17	0.24	627.2	67.5	13.94	0.24	27	14.1014	0.479076	14.1014	0.479076
				100_02a		bd	855.293	66.7419	142.556	161134	403264	58.2153	0.329376	52.35	0.899249	426.09	2.99687	0.0724923	8.67286	0.0234475	9.17604	0.00234692	2.99687	0.326597	23.49	2.13	14.81	0.44	1036	175	14.56	0.44	46	14.6119	0.849933	14.6119	0.849933
				100_02b		bd	3060.99	181.728	300.097	367795	1489922	35.9653	1.09612	119.492	3.32242	447.921	1.83458	0.059589	4.12061	0.0183346	4.51056	0.00223254	1.83458	0.406731	18.41	0.82	14.17	0.26	615.4	88.9	14.01	0.26	26	14.1347	0.509714	14.1347	0.509714
				100_02b		bd	14842.9	745.007	2953.56	4071587	6987721	84.8923	5.73658	1322.8	15.5821	436.476	1.32986	0.0501257	1.88506	0.0158273	2.30694	0.00229107	1.32986	0.576459	15.92	0.36	14.81	0.2	186.7	43.9	14.77	0.2	7.3	14.6815	0.388165	14.6815	0.388165
				100_03		bd	5175.14	257.114	862.113	1184984	2549259	67.7234	1.94743	384.985	5.68466	449.065	1.74932	0.0483633	2.74184	0.0148427	3.25236	0.00222685	1.74932	0.537862	14.92	0.48	14.17	0.25	137.8	64.3	14.15	0.25	5.2	14.3022	0.498521	14.3022	0.498521
				100_03b		bd	4713.94	252.114	751.732	1163117	2256992	75.0817	1.76904	377.881	5.03293	441.526	1.83062	0.0521439	2.85658	0.0162762	3.39282	0.00226487	1.83062	0.539559	16.42	0.55	14.81	0.27	258.8	65.6	14.75	0.27	10	14.4765	0.525543	14.4765	0.525543
				100_04		bd	6320.95	313.04	366.715	502417	3075558	23.8002	2.16596	163.228	6.85827	449.974	1.90345	0.0493197	2.90432	0.0151057	3.47249	0.00222235	1.90345	0.548151	15.22	0.52	14.17	0.27	184.7	67.5	14.14	0.27	7.2	14.256	0.540042	14.256	0.540042
				100_05		bd	5796.67	307.397	345.119	388182	2771940	20.4029	1.99533	126.115	6.18123	438.764	1.94209	0.0534382	3.13574	0.0167852	3.68844	0.00227913	1.94209	0.526535	16.92	0.62	14.81	0.29	327.8	71	14.72	0.29	13	14.5436	0.55922	14.5436	0.55922
				100_06		bd	4277.09	253.057	404.729	463423	2099016	32.1664	1.52681	150.56	4.68065	448.316	2.06284	0.0587525	2.7047	0.0180613	3.40158	0.00223057	2.06284	0.606436	18.21	0.61	14.17	0.29	591.6	58.5	13.76	0.29	25	14.1375	0.573561	14.1375	0.573561
				100_07		bd	3454.08	253.057	260.212	324262	1728954	27.3246	1.20657	105.348	3.85544	461.477	1.67716	0.0532733	3.20675	0.0159098	3.61886	0.00216695	1.67716	0.46345	16.02	0.58	14.17	0.24	303.6	73.3	14.12	0.24	12	13.8312	0.459413	13.8312	0.459413
				100_08		bd	2863.24	253.057	315.873	388246	1202525	47.0385	1.03729	126.136	2.68154	377.437	2.13651	0.0569003	3.32108	0.0207767	3.94895	0.00264945	2.13651	0.541033	20.9	0.82	16.74	0.36	530.6	72.9	16.48	0.36	22	16.8299	0.708759	16.8299	0.708759
				100_09		bd	2226.66	253.057	285.282	315864	1069576	43.0259	0.816063	102.62	2.38508	440.675	2.02429	0.0536149	5.09606	0.0167677	5.4834	0.00226925	2.02429	0.369168	16.92	0.92	14.81	0.3	328	116	14.77	0.3	13	14.4773	0.580201	14.4773	0.580201
				100_10		bd	3768	253.057	298.245	321692	1820861	25.7397	1.31613	104.513	4.06039	443.688	1.92949	0.0494277	3.17341	0.0153532	3.71395	0.00225384	1.92949	0.519524	15.52	0.57	14.81	0.29	126.7	74.6	14.8	0.29	4.7	14.4559	0.555023	14.4559	0.555023
				100_11		bd	6047.37	253.057	422.322	470203	2969088	23.073	2.09672	152.763	6.62085	455.562	1.79294	0.0496194	2.79323	0.015011	3.31915	0.00219509	1.79294	0.540181	15.12	0.5	14.17	0.25	169.2	65.3	14.14	0.25	6.5	14.0759	0.50208	14.0759	0.50208
				100_13		bd	4135.1	253.057	319.441	399741	1969337	29.5732	1.44348	129.87	4.39148	440.849	1.90162	0.0495163	3.37402	0.0154798	3.87301	0.00226835	1.90162	0.490993	15.62	0.6	14.81	0.28	141.9	79.2	14.8	0.28	5.4	14.5473	0.550403	14.5473	0.550403
				100_14		bd	4932.73	253.057	415.84	533665	2408189	32.2863	1.73601	173.38	5.37009	443.513	1.79958	0.0521733	3.68489	0.0162124	4.10084	0.00225472	1.79958	0.438833	16.32	0.66	14.81	0.27	244.6	84.8	14.78	0.27	9.8	14.4112	0.514307	14.4112	0.514307
				100_15		bd	1258.44	253.057	187.57	203277	590934	50.1175	0.474015	66.0418	1.31774	428.586	2.9827	0.0637406	5.74757	0.0204967	6.47542	0.00233326	2.9827	0.460619	20.6	1.32	14.81	0.44	763	121	14.5	0.44	33	14.693	0.856965	14.693	0.856965
				100_16		bd	5582.29	253.057	381.58	467890	2693100	25.3123	1.93171	152.011	6.00542	447.014	1.90874	0.0497529	2.7101	0.0153392	3.31481	0.00223707	1.90874	0.575824	15.42	0.51	14.17	0.27	215.3	62.5	14.12	0.27	8.5	14.3425	0.544527	14.3425	0.544527
				100_12	inherited	bd	149187	253.057	10579.5	646620	3154506	29.8647	51.8399	210.078	7.03432	19.4519	1.67116	0.0518593	1.27792	0.367427	2.10377	0.051409	1.67116	0.794365	317.72	5.73	323.11	5.27	278.4	29.6	321.44	5.12	-1.9	323.565	10.5524	321.44	5.12
Naxos	Folded Aplite	E Granodiorite	17TL106	106_01		bd	7305.64	383.226	922.183	1182218	3459773	49.7841	2.66419	384.086	7.71504	435.298	1.51524	0.0515911	2.58184	0.016334	2.99363	0.00229728	1.51524	0.506153	16.42	0.49	14.81	0.22	258.8	59.1	14.76	0.22	10	14.6938	0.441838	14.6938	0.441838
				106_02a		bd	10681.4	548.785	1419.68	1935881	5074336	55.5827	3.91376	628.941	11.3154	440.383	1.44049	0.0496122	1.86672	0.0155261	2.35789	0.00227075	1.44049	0.610924	15.62	0.37	14.81	0.21	141.9	43.9	14.79	0.21	5.4	14.5609	0.417274	14.5609	0.417274
				106_03a		bd	6614.28	357.587	864.943	1259414	3096815	59.2507	2.42464	409.166	6.90567	430.061	1.61769	0.0529013	2.388	0.0169528	2.88435	0.00232525	1.61769	0.560851	17.12	0.49	14.81	0.24	354.6	53.9	14.69	0.24	15	14.8478	0.475861	14.8478	0.475861
				106_04a		bd	8883.05	444.662	971.55	1350894	3959604	49.7061	3.18651	438.887	8.82963	417.956	1.58342	0.0494905	2.31437	0.0163191	2.8042	0.0023926	1.58342	0.564659	16.42	0.46	15.45	0.24	160.1	54.3	15.43	0.24	6.1	15.3439	0.483395	15.3439	0.483395
				106_04b		bd	8100.1	417.57	1434.02	1985789	3771391	76.7135	3.07897	645.155	8.40993	435.475	1.39981	0.051326	2.3344	0.0162435	2.72193	0.00229635	1.39981	0.514272	16.32	0.44	14.81	0.21	244.6	53.9	14.77	0.21	9.8	14.6928	0.408288	14.6928	0.408288
				106_05a		bd	3594.84	210.295	318.703	410376	1655009	36.1261	1.27588	133.325	3.69055	428.421	1.65709	0.0577169	3.05269	0.0185669	3.47346	0.00233415	1.65709	0.477073	18.71	0.64	14.81	0.25	554.2	66.5	14.62	0.24	24	14.8131	0.483465	14.8131	0.483465
				106_05b		bd	3158.47	180.037	400.099	484137	1445266	48.8047	1.15669	157.289	3.22284	425.839	1.73396	0.056395	3.83175	0.0182516	4.20582	0.0023483	1.73396	0.412276	18.41	0.77	14.81	0.26	518.6	84.3	14.7	0.26	22	14.9281	0.510701	14.9281	0.510701
